# Supplementary material for: Messenger RNAs of Yeast Virus-Like Elements Contain Non-templated 5′ Poly(A) Leaders, and Their Expression Is Independent of eIF4E and Pab1
Source: PubMed Central journal article supplement (PMC6831550; doi:10.3389/fmicb.2019.02366), 2019-10-30
Supplement: Data_Sheet_1.pdf [file Data_Sheet_1.pdf]

*Václav Vopálenský, Michal Sýkora, Tomáš Mašek, Martin Pospíšek*

## SUPPLEMENTARY MATERIAL AND METHODS

### Oligo-capping of pGKL mRNAs

Total yeast RNA was purified by the hot acidic phenol procedure (Lin et al., 1996). Remaining DNA was removed by a DNA-free Kit (Ambion) according to the manufacturer's protocol. The quality of RNA was assessed by electrophoresis according to the protocol by Masek et al. (Masek et al., 2005). Oligo-capping was performed using FirstChoice<sup>®</sup> RLM-RACE Kit (Invitrogen) according to the manufacturer's protocol. In brief, 5 µg of total yeast RNA was incubated with calf intestine alkaline phosphatase for 1 hour at 37°C; purified using acidic phenol/chloroform extraction and precipitated using ammonium acetate and isopropanol. Precipitated RNA was washed with 70% ethanol, resuspended in 1x tobacco acid pyrophosphatase buffer, and incubated with tobacco acid pyrophosphatase (TAP) for 1 hour at 37°C. A control reaction without the presence of TAP was also carried. After incubation 0.5 µl of 5' RACE Adapter, T4 RNA ligase buffer, and 2.5 U of T4 RNA ligase were added to the mixture, which was then incubated for 1 hour at 37°C. Reverse transcription was performed using 0.15 µg of random primers (Invitrogen) and 100 U of SSC III Reverse Transcriptase (Invitrogen) in a 20 µl reaction (25°C for 10 min, 50°C for 99 min, 70°C for 15 min). After reverse transcription, the cDNA was purified using the High Pure PCR Product Purification Kit (Roche). For amplification of cDNA, 2.5 µl of the reaction mixture was used for the following PCR with the 5' RACE Outer Primer and 5RACE\_O8\_K2 primer (5 min at 95°C; then 35 cycles of 30 sec at 94°C, 30 sec at 55°C, and 30 sec at 72°C; and finally, 10 min at 72°C). After amplification, 1 µl of the PCR mixture was used as a template for semi-nested PCR using 5' RACE Inner Primer and 5RACE\_O8\_K2 primer (5 min at 95°C; then 35 cycles of 30 sec at 94°C, 30 sec at 55°C, and 30 sec at 72°C; and finally, 10 min at 72°C). The corresponding fragment was purified from gel using a FastBack DNA minispin kit (Renogen Biolab), cloned into a pCR4-TOPO plasmid using the TOPO strategy and sequenced using the universal T7 promoter primer. All primers used in this study are listed in Table S1.

### Quantification of mRNA abundances using qRT-PCR

Total yeast RNA was isolated from *K. lactis* IFO1267 from the late exponential growth phase (OD<sub>600</sub> app. 2.8) as described previously. After DNA removal using DNase I (Ambion), cDNA was synthesized using SuperScript III Reverse Transcriptase (Invitrogen; RT+ reaction) and diluted 50 times. Control reaction, containing all components of the reverse transcription reaction except for the SSCIII enzyme (RT-), was also done. Two and half microliters of diluted RT reaction were subjected to Real-Time PCR amplification. qRT-PCR experiment was performed using LightCycler<sup>®</sup> 480 instrument (Roche) and LightCycler<sup>®</sup> 480 SYBR Green I Master (Roche). The 10 µl reactions were prepared in triplicates; each individual reaction contained 2.5 µl of 50 times diluted cDNA; 500 nM primers (see Table S1) and 5 µl of LightCycler<sup>®</sup> 480 SYBR Green I Master. After amplification (5 min at 95°C;

then 45 cycles of 15 sec at 95°C, 20 sec at 55°C, and 30 sec at 72°C) relative quantification was applied to calculate Cp value for each gene analyzed. For evaluation of obtained results, semi-quantitative PCR reaction (5 min at 95°C; then 32 cycles of 30 sec at 95°C, 30 sec at 55°C, and 30 sec at 68°C; and finally, 10 min at 68°C) was performed with 2.5 µl of 50 times diluted cDNA (both RT+ and RT-) and the same primer combination as mentioned above. After amplification, 5 µl of the sample were analyzed using agarose gel electrophoresis (3% agarose in TAE buffer; 7 V/cm).

### Statistical analyses and sample size estimation

Correlation of non-templated 5' mRNA poly(A) leader length and 5' mRNA capping frequency was analyzed using Pearson correlation coefficient. Variance of 5' mRNA poly(A) leader length of individual ORFs was analyzed using nonparametric Kruskal-Wallis test followed by *post hoc* Dunn test with p-value adjustment according to the Benjamini-Hochberg FDR method. This data did not follow normal distribution according to the Shapiro-Wilk test. Variance of non-templated 5' mRNA poly(A) leader length of ORFs with different number of template-coded consecutive 5' adenosines was analyzed using nonparametric Kruskal-Wallis test followed by *post hoc* Dunn test with p-value adjustment according to the Benjamini-Hochberg FDR method. This data did not follow normal distribution according to the Shapiro-Wilk test. Categorical binary data of 5' mRNA cap a 5' poly(A) presence in pGKL transcripts were evaluated using two-tailed Fisher's exact test with 95% confidence interval. Variance of killer toxin activities of individual strains from at least three independent measurements was evaluated using one-way ANOVA followed by *post-hoc* Tukey's HSD test with Scheffé multiple comparison. Normal distribution of the data was confirmed by Shapiro-Wilk test.

For results containing measurement variables and "*a priori*" calculation of the sample size we assumed normal distribution of data and one-way ANOVA tests. "*A priori*" samples size was computed with defined number of data groups and effect size ( $f$ ),  $\alpha$  error probability and statistical power ( $1-\beta$ ) adjusted conventionally to 0.25, 0.05 and 0.8, respectively. This refers to experiments depicted in Figures 4, 6 and 14.

Data with binomial distribution (yes/no answer) were analyzed using a conservative Fisher's exact test. Pilot experiments were performed to obtain estimates of the P1 and P2 proportions. Values of  $\alpha$  error probability and statistical power ( $1-\beta$ ) were set conventionally to 0.05 and 0.8, respectively, for all the "*a priori*" calculations of sample size of groups 1 and 2 and total sample size in 2x2 contingency tables. Estimates of P1 and P2 were set to 0.2 and 0.6, respectively, for experiments depicted in Figure 7, and 0.2 and 0.8, respectively, for experiments depicted in Figure S2. Point estimates in bar plots were calculated using LaPlace method.

Actual sample sizes of the experiments can be found in the legends of the graphical interpretations of the experimental results or in the associated tables containing raw data or both. Actual sample sizes and statistical power were always reasonably higher than their computed "*a priori*" estimates.

All the sample size calculations were performed with G\*Power 3 software (Faul et al., 2007).

SUPPLEMENTARY FIGURES AND TABLES

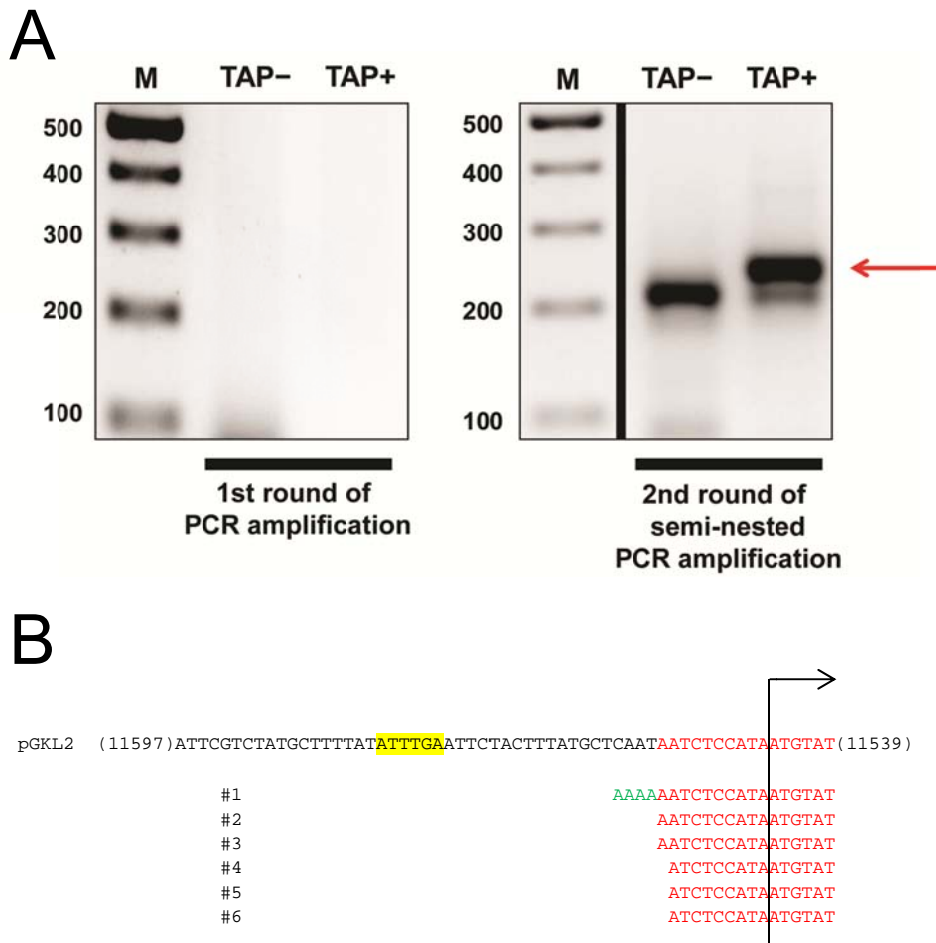

**Figure S1.** Transcripts of pGKL plasmids contain a 5' cap structure. (A) Electrophoretogram of *K2ORF8* mRNA oligo-capping analysis from *K. lactis* IFO1267 strain. Panel on the left displays electrophoretic analysis of the products obtained after first round of cDNA amplification using PCR. Panel on the right displays electrophoretic analysis of the products obtained after second round of cDNA amplification using semi-nested PCR and product of the first round PCR amplification as a template. The reactions in which the 5' dephosphorylated RNA was treated and not treated with tobacco acid pyrophosphatase prior RNA oligo ligation are labelled as TAP+ and TAP-, respectively. Specific product (~246 bp) corresponding to cDNA of *K2ORF8* 5' UTR is marked with red arrow. M: GeneRuler 100 bp Plus DNA Ladder (Thermo Scientific). (B) Oligo-capping analysis of the *K2ORF8* gene from *K. lactis* IFO1267 strain. In this panel, the upper template (plasmid) DNA sequence correspond to pGKL2 plasmid (GI: 2868) with the UCS sequence highlighted in yellow; sequences located below represent individual sequenced cDNA clones (the 5' untranslated region is displayed to the full extent until the translation start codon, ATG). The graphical representation of the oligo-capping results is similar to that in the Table S5A.

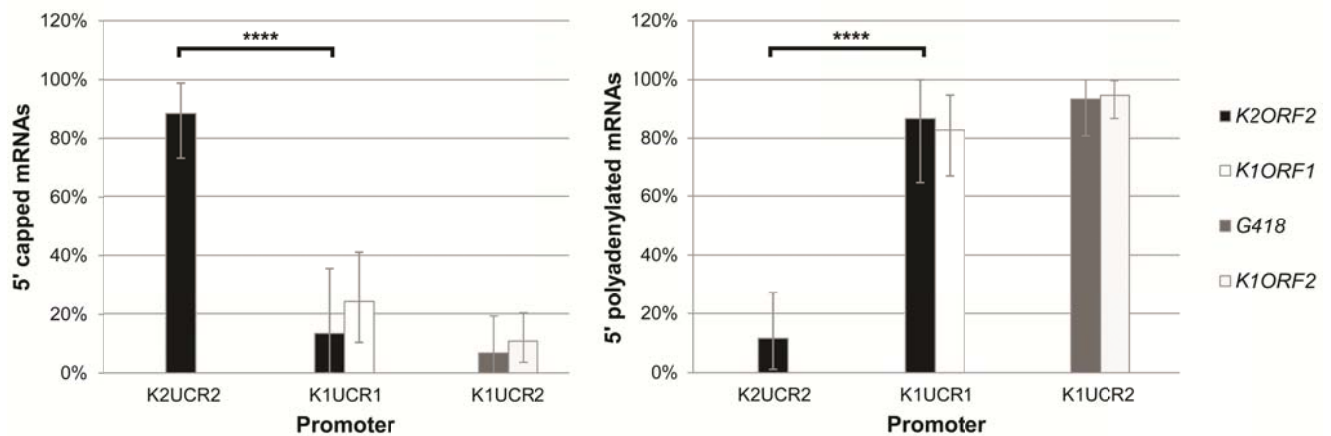

**Figure S2.** Promoters determine the degree of 5' capping and 5' polyadenylation of pGKL mRNAs. Analysis of 5' ends of pRKL2-1 plasmids revealed that presence of both non-templated adenosine addition and guanosine cap in pGKL-encoded mRNAs is directed by the linear plasmid promoters. Bars represent the frequency (in %) of 5' mRNA capping and polyadenylation with the error bars depicting the 95% confidence intervals calculated using the adjusted Wald method. Results were statistically evaluated using two-sided Fisher's exact test with 95% confidence interval. \*\*\*\*: significance level  $p < 0.0001$ . *K2ORF2* controlled by the *K1UCR1* promoter produces less frequently capped transcripts with a higher level of non-template 5' polyadenylation, similar to wild-type *K1ORF1* transcripts, and in contrast to *K2ORF2* transcripts controlled by the natural *K2UCR2* promoter, where the occurrence of 5' cap and 5' polyadenylation is significantly higher and lower, respectively. When *K1UCR2* promoter was used for expression of either its own gene (*K1ORF2*), or a heterologous bacterial gene coding for aminoglycoside 3'-phosphotransferase (*G418*), similar degree of both 5' mRNA capping and non-template polyadenylation occurred on the corresponding transcripts.

**A**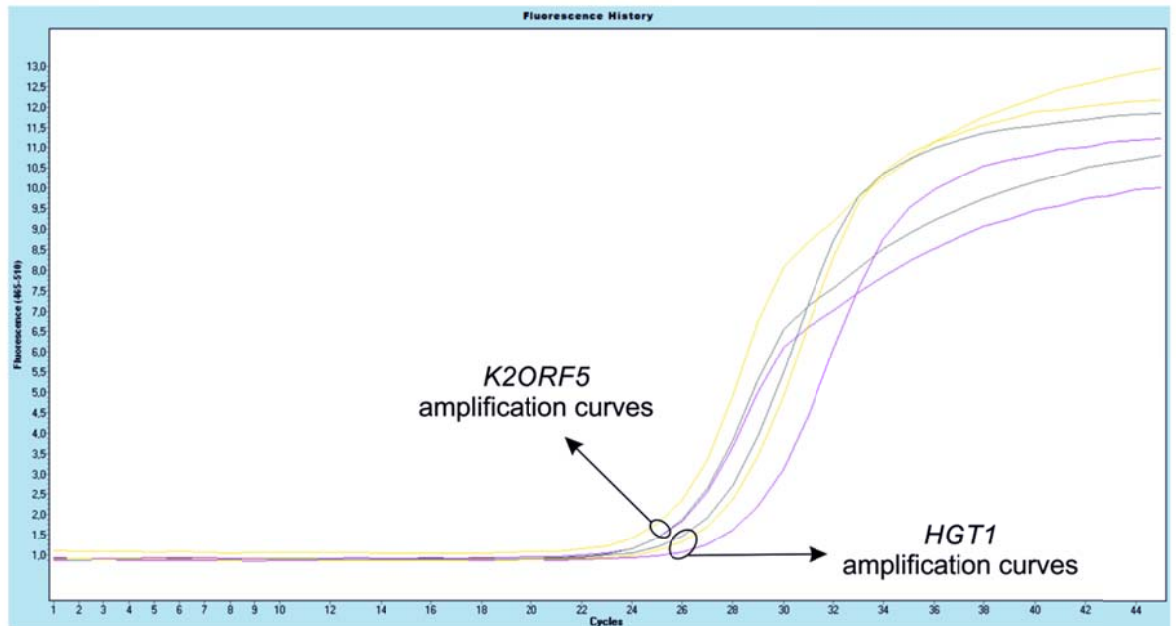**B**

| gene          | replicate | Cp    | Mean Cp | STD Cp |
|---------------|-----------|-------|---------|--------|
| <i>K2ORF5</i> | 1         | 25,22 | 25,20   | 0,09   |
|               | 2         | 25,28 |         |        |
|               | 3         | 25,09 |         |        |
| <i>HGT1</i>   | 1         | 28,51 | 27,65   | 0,77   |
|               | 2         | 27    |         |        |
|               | 3         | 26,15 |         |        |

**C**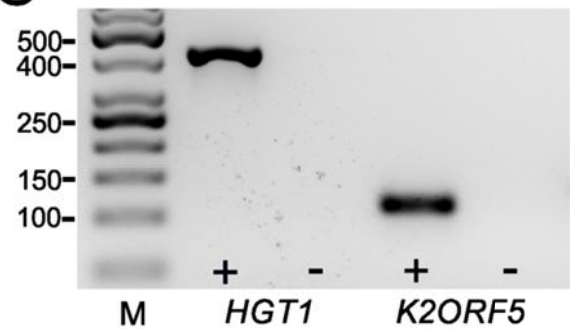

**Figure S3.** Validation of *K2ORF5* and *HGT1* mRNA abundances in the *K. lactis* IFO1267 total RNA. (A) Total RNA was isolated from *K. lactis* IFO1267 strain, DNase I-treated, reverse transcribed and subjected to the qRT-PCR analysis. The amplification curves of the *K2ORF5* and *HGT1* fragments demonstrate comparable amounts of *K2ORF5* and *HGT1* mRNAs in *K. lactis* cells in the late exponential growth phase. Amplification curves of the corresponding gene fragments are circled. The number of cycles is plotted on the x axis; relative fluorescence is depicted on the y axis. (B) Cp values calculated from Real-Time PCR experiment using LightCycler<sup>®</sup> 480 Software. Values are shown for each individual replicate; mean Cp value was also calculated from the individual measurements. (C) Semi-quantitative PCR analysis using agarose gel electrophoresis. 5 $\mu$ l of PCR reaction were analyzed using agarose gel electrophoresis; for each gene RT+ and RT- template cDNA was used. M - GeneRuler 50 bp DNA Ladder (Thermo Scientific); *HGT1*+/*K2ORF5*+ - cDNA used as a template; *HGT1*- / *K2ORF5*- correspond to - RT reaction without reverse transcriptase that was used as a template (negative) control.

A

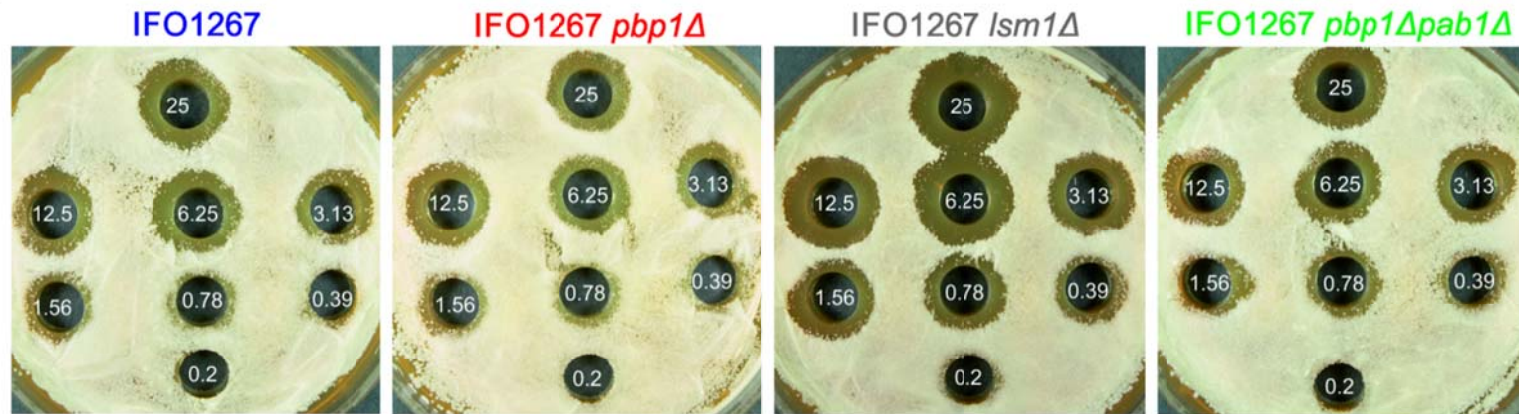

B

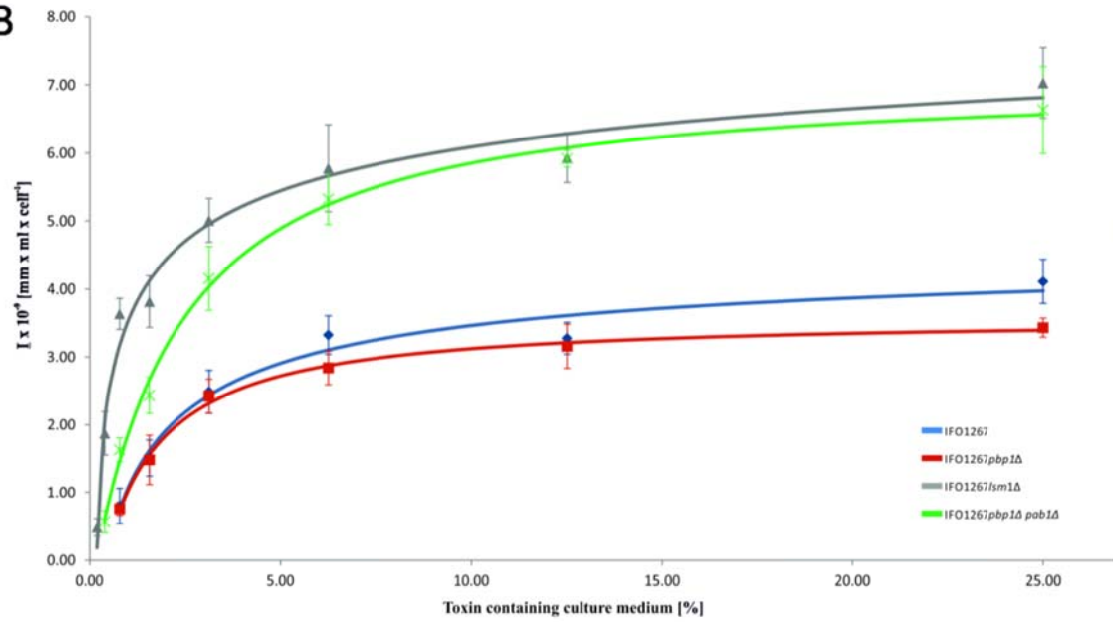

C

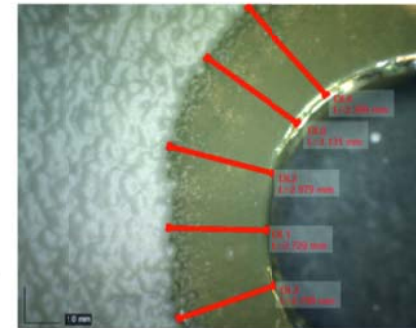

**Figure S4.** Quantification of killer toxin production in *K. lactis* IFO1267, IFO1267 *pbp1Δ*, IFO1267 *lsm1Δ* and IFO1267 *pbp1Δ pab1Δ* strains. Toxin levels in a culture medium in late exponential phase (~35 hours) when all the cultures reached comparable OD<sub>600</sub> (for the corresponding growth curve refer Figure 14), are depicted. (A) Production of the pGKL killer toxin into culture medium was assayed by a well diffusion test on YPD agar plates with a lawn of the *S. cerevisiae* S6/1 sensitive strain. Filter-sterilized samples were serial two-fold diluted; 100 μl of serially diluted toxin-containing culture medium were loaded into wells. The numbers in wells depict volume (in %) of the filter-sterilized culture medium diluted in YPD medium to reach the total volume of 100 μl loaded into the well. Wider inhibition zones corresponding to the higher toxin concentration are clearly visible in wells containing culture medium from the *lsm1Δ* strain and partly also from *pbp1Δpab1Δ* double-deletion strain. The *pbp1Δpab1Δ* strain displays slow growth in comparison to other strains tested (Figure 14) and its increased toxin production is better visible after normalization of data to the density of production cells. (B) Plot represents relationship between the width of the inhibition zone normalized to the concentration of the production cell ( $I$ ; y axis) and a corresponding concentration of the diluted toxin-containing culture medium (%; x axis) used for the well inhibition assay as depicted on panel A. The curves can be described by hyperbolic functions, limits of which correspond to the calculated theoretical width of the normalized inhibition zone at killer toxin saturation ( $I_s$ ). All killer tests and subsequent analyses were performed in triplicates. Error bars represent standard deviations. (C) Widths of the inhibition zones were measured using calibrated digital microscope after incubation of the YPD agar plates at 24°C for 48 hours. At least 20 independent measurements of the single inhibition zone were performed, the mean of these values was further normalised to the concentration of production cells and obtained values ( $I$ ) were plotted (panel B).

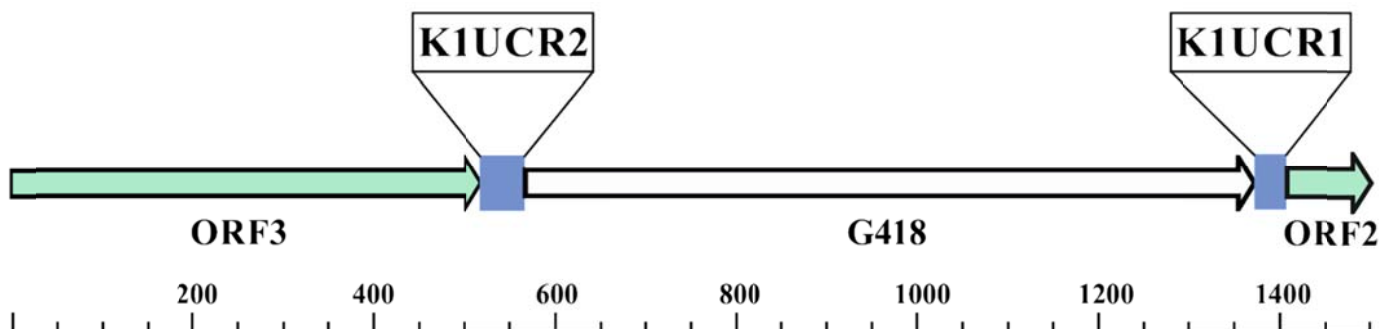

**Figure S5.** Precise manipulation of pGKL VLEs *in vivo* - general description of PCR cassette. PCR cassette used for the manipulation of pGKL2 by homologous recombination *in vivo* consists of regions homologous to the native pGKL2 VLE (in light green), an antibiotic resistance gene (*G418*) under the control of the *ORF2* promoter from pGKL1 (*K1UCR2*) and the *ORF1* promoter from pGKL1 (*K1UCR1*), which will artificially control the expression of *K2ORF2* (in light green). Promoters (UCRs) are in blue.

**Table S1.** Primers used in this study.

| ORF /gene            | primer name          | Sequence (5'-3')                                                  | use in                                   |
|----------------------|----------------------|-------------------------------------------------------------------|------------------------------------------|
| <i>K1ORF1</i>        | 5RACE_O1_K1          | CATGAAAGAACTGATTGTCTAGAAAC                                        | 5' RACE                                  |
| <i>K1ORF2</i>        | 5_RACE_O2_K1         | CCTTGACTCCATAATTTTGCAGCT                                          | 5' RACE                                  |
| <i>K1ORF3</i>        | 5RACE_O3_K1_3        | TAGGATACCAAATTCCTGAAGGC                                           | 5' RACE                                  |
| <i>K1ORF4</i>        | 5_RACE_O4_K1         | TCCATTAATCCAGAGTTATTCTTTC                                         | 5' RACE                                  |
| <i>K2ORF1</i>        | 5RACE_O1_K2          | GTTGCATTATTGCAGCTTTAGC                                            | 5' RACE                                  |
| <i>K2ORF2</i>        | 5RACE_O2_K2          | TTCGTATGTAATGTTTCCGCA                                             | 5' RACE                                  |
| <i>K2ORF3</i>        | vORF3-k2-rev_2       | GTTCTTTTGTAGCCGGTATT                                              | 5' RACE                                  |
| <i>K2ORF4</i>        | 5RACE_O4_K2          | ATCTAGAATCAAGAACAACCTTCTCA                                        | 5' RACE                                  |
| <i>K2ORF5</i>        | in ORF5 rev          | GAGTAGTCTTTTCCGTATCCT                                             | 5' RACE / eIF4E binding assay / qPCR     |
| <i>K2ORF5</i>        | K2ORF5_qPCR_F1       | TCTGACGGTTCTTTTCAGAGC                                             | qPCR                                     |
|                      | K2ORF5_qPCR_R1       | AGAGTAGTCTTTTCCGTATCCT                                            |                                          |
| <i>K2ORF6</i>        | 5RACE_O6_K2          | CTGACCAATTTAATGGTAAATTCC                                          | 5' RACE                                  |
| <i>K2ORF7</i>        | 5RACE_O7_K2          | CAAATAGCTCATTTTTGTGATAAGC                                         | 5' RACE                                  |
| <i>K2ORF8</i>        | 5_RACE_O8_K2         | TCTTTTCAAACACTATCTAGCCACC                                         | 5' RACE / oligo-capping                  |
| <i>K2ORF9</i>        | in_ORF9_rev          | TGGAAATCTATTCATGTAAC                                              | 5' RACE                                  |
| <i>K2ORF10</i>       | 5-RACEORF10k2        | CTCATTTCTGTGTTTTGTT                                               | 5' RACE                                  |
| <i>K2ORF11</i>       | 5RACE_O11_k2         | ATAATCAGATAGTAACATCTCACCTT                                        | 5' RACE                                  |
| <i>actin</i>         | actin_KL-rev         | AACACCGTCACCAAGATCCAA                                             | 5' RACE                                  |
| <i>G418</i>          | in_Kan_rev1          | GCAGTGGTGAGTAACCATGCA                                             | 5' RACE / <i>LSM1/PAB1/PBP1</i> deletion |
| universal            | olig2(dC)anchor      | GACCACGCGTATCGATGTCGACCCCCCCCCC                                   | 5' RACE                                  |
| <i>K1ORF1</i>        | ORF1-K1_tail_3       | AGGATCAGAAGTAGGACAATTAGAAT                                        | 3' RACE                                  |
| <i>K2ORF10</i>       | K27                  | AATGGCTAATAAACAGGCAG                                              | 3' RACE                                  |
| universal            | oligo(dG)anch2       | GATTGAGGTGATCTGATGTCGAGGGGGGGGGGG                                 | 3' RACE                                  |
| universal            | anch2                | GATTGAGGTGATCTGATGTCGA                                            | 3' RACE                                  |
| universal            | 5' RACE Adapter      | GCUGAUGGCGAUGAAUGAACACUGCGUUUGCUGG CUUUGAUGAAA                    | oligo-capping                            |
| universal            | 5' RACE Outer Primer | GCTGATGGCGATGAATGAACACTG                                          | oligo-capping                            |
| universal            | 5' RACE Inner Primer | CGCGGATCCGAACACTGCGTTTGCTGGCTTTGATG                               | oligo-capping                            |
| <i>HGT1</i>          | HGT1_KL-rev          | TGACAACCGTAACCGATGTAG                                             | eIF4E binding assay / qPCR               |
| <i>HGT1</i>          | HGT1_KL-forw         | GTTGCGTTTTGATATCGCATC                                             | eIF4E binding assay / qPCR               |
| <i>K2ORF5</i>        | in ORF5 forw         | AGTGGTGAAGAGGAAAAATC                                              | 3' RACE / eIF4E binding assay / qPCR     |
| <i>eIF4E (CDC33)</i> | eIF4Ef               | CCACCATGGCCGTTGAAGAAGTTAGC                                        | pGEX4T2::eIF4E construction              |
| <i>eIF4E (CDC33)</i> | IF4Er                | TGTGAAGCTTTTACAAGGTGATTGATGGTTG                                   | pGEX4T2::eIF4E construction              |
| <i>KL_Ism1</i>       | KL_Ism1-del_For      | TTTTTTTCACTTGCTCATTGAAAGAATCAGAGTCTCAA ATTACAACAGCTGAAGCTTCGTACGC | <i>LSM1</i> deletion                     |
| <i>KL_Ism1</i>       | KL_Ism1-del_Rev      | ACGATTTTTTTTGTCTTTTAAACTAATTATAATC TTATACCGCATAGGCCACTAGTGGATCTG  | <i>LSM1</i> deletion                     |
| <i>KL_Ism1</i>       | Ism1_test_F          | GTGGATCCTCAGCAGCTTTTTT                                            | <i>LSM1</i> deletion                     |
| <i>KL_Ism1</i>       | Ism1_test_R          | GGTGAAGAGGTGAAGGTTATCA                                            | <i>LSM1</i> deletion                     |
| <i>KL_pab1</i>       | KL_pab1-del_For      | GCCATCTTTTTCGGTTAAATTTATCTCATCTCATCTCAT CTCATACAGCTGAAGCTTCGTACGC | <i>PAB1</i> deletion                     |
| <i>KL_pab1</i>       | KL_pab1-del_Rev      | AGATATAGAAAGGACAAGATGAAGATCAAGGTCAAA                              | <i>PAB1</i> deletion                     |



|                                                               |                 |                                                                                             |                                                            |
|---------------------------------------------------------------|-----------------|---------------------------------------------------------------------------------------------|------------------------------------------------------------|
|                                                               |                 | AAATCAAGTCGCATAGGCCACTAGTGGATCTG                                                            |                                                            |
| <i>KL_pab1</i>                                                | pab1_test_F     | TTACTGGCCAAGAGATGTCCC                                                                       | <i>PAB1</i> deletion                                       |
| <i>KL_pab1</i>                                                | pab1_test_R     | AGTTGGAAGACCCCATTTTCA                                                                       | <i>PAB1</i> deletion                                       |
| <i>KL_pbp1</i>                                                | KL_pbp1-del_Rev | ACAAGTGGATACAATTGAATCCTTAATGGTAGCCCT<br>AATTCGAACGCATAGGCCACTAGTGGATCTG                     | <i>PBP1</i> deletion                                       |
| <i>KL_pbp1</i>                                                | KL_pbp1-del_For | AATTAGTAGCGACTCAGGTTTCTATACCAGGCTTC<br>AGCAACCGCAGCTGAAGCTTCGTACGC                          | <i>PBP1</i> deletion                                       |
| <i>KL_pbp1</i>                                                | pbp1_test_F_2   | GATGGGCCTCTACAATGCAGAT                                                                      | <i>PBP1</i> deletion                                       |
| <i>KL_pbp1</i>                                                | pbp1_test_R_2   | GATCGTTGTTATTGTCCGCAA                                                                       | <i>PBP1</i> deletion                                       |
| <i>G418</i>                                                   | KanV2F          | GTTGTATTGATGTTGGACGAGTCGG                                                                   | <i>LSM1/PAB1/PBP1</i><br>deletion                          |
| <i>K2ORF3</i>                                                 | ORF3_SAM_del_F1 | ATTAAGTATGCTTCTCTAAAACCACTTTATTGGCTATTG<br>GGTCTGCAAAAGCTGGAGCTATAACTAAATGGACTA<br>ATCTAA   | promoter exchange                                          |
| ORF3-pGKL2 (3' end) +<br>ORF2-K1_5' UTR                       | ORF3_SAMdel_R1  | AAAAACTTTCATATATTAAGTAGCTTTCACGGTCTCAT<br>TTTTTAGAAAAGAAATGA                                | promoter exchange                                          |
| ORF3-pGKL2 (3' end) +<br>ORF2-K1_5' UTR                       | KL_orf6C_Flag2F | GACCGTGAAAGCTACTTAATATATGAAAGTTTTT                                                          | promoter exchange                                          |
| G418 (3' end) +<br>ORF1-pGKL1_5' UTR +<br>ORF2-pGKL2 (5' end) | ORF3_SAMdel_R2  | TTAAGAATGCTAATTCATCATTCAATTTTAAATTAATA<br>ATGTAATTCATATATTATAGTTTAGAAAACTCATCGA<br>GCATCAAA | promoter exchange                                          |
| <i>K2ORF3</i>                                                 | in_ORF3_forw    | CTCTGAAATAGAGTTTG                                                                           | verification of<br>plasmid<br>modification                 |
| <i>K2ORF3</i>                                                 | K2_ORF3_for_seq | ATGAAGAATTTTCAGAAAGAAGTCC                                                                   | verification of<br>plasmid<br>modification /<br>sequencing |

Restriction sites of the primers used for cloning with the restriction endonucleases are underlined.

**Table S2.** Yeast strains used in this study.

| Yeast strain                           | Genotype                                                                                                                                                          | Reference / Source                |
|----------------------------------------|-------------------------------------------------------------------------------------------------------------------------------------------------------------------|-----------------------------------|
| <i>K. lactis</i> strains               |                                                                                                                                                                   |                                   |
| IFO1267                                | wild-type <i>MATa</i> pGKL1 <sup>+</sup> pGKL2 <sup>+</sup>                                                                                                       | Institute for Fermentation, Osaka |
| IFO1267 <i>pbp1::G418</i>              | <i>MATa</i> <i>pbp1::G418</i> pGKL1 <sup>+</sup> pGKL2 <sup>+</sup>                                                                                               | This study                        |
| IFO1267 <i>pbp1Δ</i>                   | <i>MATa</i> <i>pbp1Δ</i> pGKL1 <sup>+</sup> pGKL2 <sup>+</sup>                                                                                                    | This study                        |
| IFO1267 <i>pbp1Δ pab1Δ</i>             | <i>MATa</i> <i>pbp1Δ pab1::G418</i> pGKL1 <sup>+</sup> pGKL2 <sup>+</sup>                                                                                         | This study                        |
| IFO1267 <i>lsm1Δ</i>                   | <i>MATa</i> <i>lsm1::G418</i> pGKL1 <sup>+</sup> pGKL2 <sup>+</sup>                                                                                               | This study                        |
| IFO1267_pRKL2-1                        | <i>MATa</i> pGKL1 <sup>+</sup> pRKL2-1 <sup>+</sup> (K1UCR2-G418, K1UCR1-K2ORF2)                                                                                  | This study                        |
| IFO1267_pRKL1-1                        | pRKL1-1 <sup>+</sup> (K1UCR2-G418, orf2Δ) pGKL2 <sup>+</sup>                                                                                                      | (Sýkora et al., 2018)             |
| IFO1267_pRKL1-2                        | pRKL1-2 <sup>+</sup> (K1UCR2 <sup>-</sup> -G418, orf2Δ) pGKL2 <sup>+</sup>                                                                                        | (Sýkora et al., 2018)             |
| IFO1267_pRKL1-3                        | pRKL1-3 <sup>+</sup> (K1UCR2 <sup>**</sup> -G418, orf2Δ) pGKL2 <sup>+</sup>                                                                                       | (Sýkora et al., 2018)             |
| <i>S. cerevisiae</i> strains           |                                                                                                                                                                   |                                   |
| S6/1                                   | <i>MATα</i>                                                                                                                                                       | (Woods and Bevan, 1968)           |
| YAT547                                 | <i>MATα</i> <i>leu2 trp1 cyh2 gal can1 kar1</i> ρ <sup>0</sup> [dsRNA-L pGKL1 <sup>+</sup> pGKL2 <sup>+</sup> ]                                                   | (Gunge and Yamane, 1984)          |
| CWO4CDC33wt                            | <i>MATa</i> <i>his3-11,15 ade2-1 ura3-1 trp1-1a leu2-3,112 can100 cdc33::LEU2</i> [CDC33wt TRP1 ARS CEN]                                                          | (Altmann et al., 1989)            |
| CWO4cdc33-1                            | <i>MATa</i> <i>his3-11,15 ade2-1 ura3-1 trp1-1a leu2-3,112 can100 cdc33::LEU2</i> [cdc33-1 TRP1 ARS CEN]                                                          | (Altmann et al., 1989)            |
| CWO4cdc33-42                           | <i>MATa</i> <i>his3-11,15 ade2-1 ura3-1 trp1-1a leu2-3,112 can100 cdc33::LEU2</i> [cdc33-42 TRP1 ARS CEN]                                                         | (Altmann et al., 1989)            |
| CWO4ρ <sup>0</sup> CDC33wt             | <i>MATa</i> <i>his3-11,15 ade2-1 ura3-1 trp1-1a leu2-3,112 can100 cdc33::LEU2</i> ρ <sup>0</sup> [CDC33wt TRP1 ARS CEN]                                           | This study                        |
| CWO4ρ <sup>0</sup> cdc33-1             | <i>MATa</i> <i>his3-11,15 ade2-1 ura3-1 trp1-1a leu2-3,112 can100 cdc33::LEU2</i> ρ <sup>0</sup> [cdc33-1 TRP1 ARS CEN]                                           | This study                        |
| CWO4ρ <sup>0</sup> cdc33-42            | <i>MATa</i> <i>his3-11,15 ade2-1 ura3-1 trp1-1a leu2-3,112 can100 cdc33::LEU2</i> ρ <sup>0</sup> [cdc33-42 TRP1 ARS CEN]                                          | This study                        |
| CWO4ρ <sup>0</sup> CDC33wt[pGKL1/2]    | <i>MATa</i> <i>his3-11,15 ade2-1 ura3-1 trp1-1a leu2-3,112 can100 cdc33::LEU2</i> ρ <sup>0</sup> [pGKL1 <sup>+</sup> pGKL2 <sup>+</sup> ] [CDC33wt TRP1 ARS CEN]  | This study                        |
| CWO4ρ <sup>0</sup> cdc33-1[pGKL1/2]    | <i>MATa</i> <i>his3-11,15 ade2-1 ura3-1 trp1-1a leu2-3,112 can100 cdc33::LEU2</i> ρ <sup>0</sup> [pGKL1 <sup>+</sup> pGKL2 <sup>+</sup> ] [cdc33-1 TRP1 ARS CEN]  | This study                        |
| CWO4ρ <sup>0</sup> cdc33-42[pGKL1/2]   | <i>MATa</i> <i>his3-11,15 ade2-1 ura3-1 trp1-1a leu2-3,112 can100 cdc33::LEU2</i> ρ <sup>0</sup> [pGKL1 <sup>+</sup> pGKL2 <sup>+</sup> ] [cdc33-42 TRP1 ARS CEN] | This study                        |
| CWO4ρ <sup>0</sup> CDC33wt[pYX212::M1] | <i>MATa</i> <i>his3-11,15 ade2-1 ura3-1 trp1-1a leu2-3,112 can100 cdc33::LEU2</i> ρ <sup>0</sup> [CDC33wt TRP1 ARS CEN] [M1 URA3 2μ ori]                          | This study                        |

|                                    |                                                                                                                                                                                  |            |
|------------------------------------|----------------------------------------------------------------------------------------------------------------------------------------------------------------------------------|------------|
| CWO4 $\rho^0$ cdc33-1[pYX212::M1]  | <i>MATa his3-11,15 ade2-1 ura3-1 trp1-1a leu2-3,112 can100 cdc33::LEU2</i> $\rho^0$<br>[pGKL1 <sup>+</sup> pGKL2 <sup>+</sup> ] [cdc33-1 TRP1 ARS<br>CEN] [M1 URA3 2 $\mu$ ori]  | This study |
| CWO4 $\rho^0$ cdc33-42[pYX212::M1] | <i>MATa his3-11,15 ade2-1 ura3-1 trp1-1a leu2-3,112 can100 cdc33::LEU2</i> $\rho^0$<br>[pGKL1 <sup>+</sup> pGKL2 <sup>+</sup> ] [cdc33-42 TRP1 ARS<br>CEN] [M1 URA3 2 $\mu$ ori] | This study |

CEN-ARS, centromere-autonomous replicating sequence

\*UCR sequence bearing one point mutation in putative initiator region (INR)

\*\*UCR sequence bearing two point mutations in putative initiator region (INR)

**Table S3.** Plasmids used in this study.

| Plasmid        | Description                                                                                                                                          | Reference               |
|----------------|------------------------------------------------------------------------------------------------------------------------------------------------------|-------------------------|
| pGKL1          | native, kill <sup>+</sup>                                                                                                                            | (Gunge et al., 1981)    |
| pGKL2          | native                                                                                                                                               | (Gunge et al., 1981)    |
| pRKL1-1        | modified pGKL1 containing G418 resistance marker under control of K1UCR2, deleted ORF2 gene                                                          | (Sýkora et al., 2018)   |
| pRKL1-2        | modified pGKL1 containing G418 resistance marker under control of K1UCR2 bearing one point mutation in putative initiator region, deleted ORF2 gene  | (Sýkora et al., 2018)   |
| pRKL1-3        | modified pGKL1 containing G418 resistance marker under control of K1UCR2 bearing two point mutations in putative initiator region, deleted ORF2 gene | (Sýkora et al., 2018)   |
| pRKL2-1        | modified pGKL2 containing its own ORF2 under control of K1UCR1 and G418 resistance marker under control of K1UCR2                                    | This study              |
| pUG6           | loxP-pAgTEF1-kanMX-tAgTEF1-loxP, G418 resistance, $\beta$ -lactamase                                                                                 | (Guldener et al., 1996) |
| pSH65          | pGAL1-cre, ARS CEN, pAgTEF1-ble-tScCYC1, Phleo resistance, URA3, $\beta$ -lactamase                                                                  | (Guldener et al., 2002) |
| pYX212         | 2 $\mu$ ori, URA3, $\beta$ -lactamase, TPI promoter                                                                                                  | Ingenius Inc.           |
| pYX212::M1     | pYX212 containing cDNA copy of killer virus M1                                                                                                       | This study              |
| pYX213::M1     | pYX213 containing cDNA copy of killer virus M1                                                                                                       | (Valis et al., 2006)    |
| pCR4-TOPO      | pLac, $\beta$ -lactamase, aph(3')-II, ColE1, f1 ori                                                                                                  | Invitrogen              |
| pGEX-4T-2      | N-GST; pTac; lacl, thrombin; $\beta$ -lactamase                                                                                                      | GE Healthcare           |
| pGEX4T2::CDC33 | pGEX-4T-2 containing yeast <i>S. cerevisiae</i> CDC33 gene produced as N-terminal GST fusion                                                         | This study              |

UCR - sequence located between AUG initiation codon and UCS (including) of the selected ORF

**Table S4.** Summary of 5' RACE experiments.

| plasmid | ORF number | No. of 5' non-templated adenosines | Minimal number of adenosines <sup>1</sup> at 5' ends of uncapped transcripts | % of mRNAs with 5' non-templated poly(A) leaders | Median / mean of added adenosines per mRNA | No. of analyzed clones <sup>2</sup> | % of 5' capped mRNAs | 5' UTR template complementarity <sup>3</sup> |                     |
|---------|------------|------------------------------------|------------------------------------------------------------------------------|--------------------------------------------------|--------------------------------------------|-------------------------------------|----------------------|----------------------------------------------|---------------------|
| pGKL1   | 1          | 1-10                               | 5*                                                                           | 85.1                                             | 5.0 / 5.3                                  | 27<br>(6G+23A)                      | 22.2                 | AAAAATG                                      |                     |
|         | 2          | 2-14                               | 5*                                                                           | 96.2                                             | 6.0 / 6.0                                  | 53<br>(4G+51A)                      | 7.5                  | AAAATG                                       |                     |
|         | 3          | 0-20                               | 3*                                                                           | 98.2                                             | 7.0 / 6.7                                  | 55<br>(3G+54A)                      | 5.3                  | AAAAATG                                      |                     |
|         | 4          | 0-16                               | 6                                                                            | 87.0                                             | 6.0 / 5.8                                  | 23<br>(4G+20A)                      | 17.4                 | AAAC-15nt**-ATG                              |                     |
| pGKL2   | 1          | 0-10                               | 2*                                                                           | 92.3                                             | 2.0 / 2.6                                  | 39<br>(19G+36A)                     | 48.7                 | AAATG                                        |                     |
|         | 2          | 1                                  | 6*                                                                           | 8.3                                              | 0.0 / 0.8                                  | 24<br>(22G+2A)                      | 91.7                 | AAAAAATG                                     |                     |
|         | 3          | short                              | 1-3                                                                          | 5                                                | 40.0                                       | 0.0 / 0.7                           | 10<br>(9G+4A)        | 90.0                                         | AAC-57nt**-ATG      |
|         |            | long                               | 3                                                                            | 7                                                | 7.2                                        | 0.0 / 0.2                           | 14<br>(13G+1A)       | 92.9                                         | AAAAAAG-144nt**-ATG |
|         | 4          | 0-21                               | 4*                                                                           | 36.4                                             | 0.0 / 2.0                                  | 22<br>(12G+8A)                      | 54.5                 | AAAAATG                                      |                     |
|         | 5          | 0-8                                | 3                                                                            | 90.0                                             | 2.0 / 2.7                                  | 50<br>(17G+45A)                     | 34.0                 | AAAG-81nt**-ATG                              |                     |
|         | 6          | 1-10                               | 7*                                                                           | 100.0                                            | 5.0 / 5.0                                  | 25<br>(5G+25A)                      | 20.0                 | AAAATG                                       |                     |
|         | 7          | 0-19                               | 4*                                                                           | 91.3                                             | 7.0 / 7.6                                  | 23<br>(1G+22A)                      | 4.4                  | AAAAATG                                      |                     |
|         | 8          | 1-7                                | 8                                                                            | 45.6                                             | 0.0 / 1.0                                  | 79<br>(68G+36A)                     | 86.0                 | AAT-7nt**-ATG                                |                     |
|         | 9          | 1-6                                | 5                                                                            | 83.3                                             | 2.5 / 2.9                                  | 24<br>(8G+20A)                      | 33.3                 | AAAC-19nt**-ATG                              |                     |
|         | 10         | 0-16                               | 3*                                                                           | 100.0                                            | 4.5 / 4.8                                  | 20<br>(0G+20A)                      | 0.0                  | AAAATG                                       |                     |
| 11      | 2-10       | 5                                  | 100.0                                                                        | 6.5 / 6.1                                        | 20<br>(1G+20A)                             | 5.0                                 | AAACATG              |                                              |                     |
| actin   | N/A        | 0                                  | N/A                                                                          | 0.0                                              | 0.0                                        | 49                                  | 100.0                | N/A                                          |                     |

Each ORF is characterized by the following data: 1/ ORF number; 2/ number of 5' non-templated adenosine nucleotides found in the corresponding mRNAs; 3/ minimal number of adenosine nucleotides (calculated for both templated and non-templated adenosines) found at 5' ends of uncapped transcripts; 4/ percentage of all transcripts containing 5' non-templated adenosine nucleotides; 5/ the average number (shown as the mean and median) of non-templated adenosine nucleotides per mRNA molecule; 6/ number of sequenced clones used for analyses; the number of capped and 5' polyadenylated mRNAs are depicted below the total number; 7/ percentage of all transcripts containing 5' mRNA cap structure; 8/ part of the 5' UTR complementary to the relevant plasmid genome. Please note that columns 4 and 7 may not sum to one hundred percent because some transcripts contain both 5' non-templated adenosines and a cap structure. <sup>1</sup> templated and non-templated; <sup>2</sup> G = capped transcripts; A - 5' polyadenylated transcripts; <sup>3</sup> the first templated nucleotides transcribed to the mRNA, non-templated adenosines were removed; \* these adenosines immediately precede the ATG sequence; \*\* for exact sequences, see Table S5A; transcripts from *K. lactis ACT* gene, coding for actin, were used as an internal control.

**Table S5.** Molecular analyses of plasmid specific mRNAs at the level of individual mRNA molecules.

**A** - The 5' untranslated regions of ORFs encoded by pGKL plasmids

**pGKL1-ORF1**

pGKL1 (183) TTTATTATACACATTTTCCAACATAAATATATGAATTACATTATTAATTTAAATGGAT (242)

|       |                 |
|-------|-----------------|
| #16   | AAAAAAAAAATGGAT |
| #33   | AAAAAAAAAATGGAT |
| #44   | AAAAAAAAAATGGAT |
| #4    | AAAAAAAAAATGGAT |
| #5    | AAAAAAAAAATGGAT |
| #40b  | AAAAAAAAAATGGAT |
| #39   | AAAAAATGGAT     |
| #15   | AAAAAAAAAATGGAT |
| #37   | AAAAAAAAAATGGAT |
| #48A  | AAAAAATGGAT     |
| #30   | AAAAAAAAAATGGAT |
| #23   | AAAAAAAAAATGGAT |
| #20   | AAAAAATGGAT     |
| #48B  | AAAAAATGGAT     |
| #36   | AAAAAATGGAT     |
| #47   | AAAAAATGGAT     |
| #31   | AAAAAATGGAT     |
| #48c  | GAAAAAATGGAT    |
| #41T7 | GAAAAAATGGAT    |
| #46   | AAAAAATGGAT     |
| #13   | AAAAAATGGAT     |
| #42A  | AAAAAATGGAT     |
| #41   | AAAAAATGGAT     |
| #40   | GAAATGGAT       |
| #32   | GAAATGGAT       |
| #46a  | GATGGAT         |
| #42b  | GATGGAT         |

**pGKL1-ORF2**

pGKL1 (3181) AGACCGTGAAAGCTACTTAAT **ATATGA**AAGTTTTTATAATAATTAT**AAAA**TGAAT (3235)



|      |                           |       |
|------|---------------------------|-------|
| A3b  | AAAAAAAAAAAAAAAAAAAA      | TGAAT |
| #40  | AAAAAAAAAAAAAAAAAAAA      | TGAAT |
| A13  | AAAAAAAAAAAAAAAAAAAA      | TGAAT |
| A6a  | AAAAAAAAAAAAAAAAAAAA      | TGAAT |
| #7   | AAAAAAAAAAAAAAAAAAAA      | TGAAT |
| #12  | AAAAAAAAAAAAAAAAAAAA      | TGAAT |
| P3   | AAAAAAAAAAAAAAAAAAAA      | TGAAT |
| #11  | AAAAAAAAAAAAAAAAAAAA      | TGAAT |
| #45  | <b>G</b> AAAAAAAAAAAAAAAA | TGAAT |
| #13  | AAAAAAAAAAAAAAAAAAAA      | TGAAT |
| #N40 | AAAAAAAAAAAAAAAAAAAA      | TGAAT |
| #N41 | AAAAAAAAAAAAAAAAAAAA      | TGAAT |
| P4   | AAAAAAAAAAAAAAAAAAAA      | TGAAT |
| #15  | AAAAAAAAAAAAAAAAAAAA      | TGAAT |
| A10  | AAAAAAAAAAAAAAAAAAAA      | TGAAT |
| A5b  | AAAAAAAAAAAAAAAAAAAA      | TGAAT |
| #39  | AAAAAAAAAAAAAAAAAAAA      | TGAAT |
| #N38 | AAAAAAAAAAAAAAAAAAAA      | TGAAT |
| A4   | AAAAAAAAAAAAAAAAAAAA      | TGAAT |
| P8a  | AAAAAAAAAAAAAAAAAAAA      | TGAAT |
| A1   | AAAAAAAAAAAAAAAAAAAA      | TGAAT |
| A4b  | <b>G</b> AAAAAAAAAAAAAAAA | TGAAT |
| #8   | AAAAAAAAAAAAAAAAAAAA      | TGAAT |
| A7b  | AAAAAAAAAAAAAAAAAAAA      | TGAAT |
| P7   | AAAAAAAAAAAAAAAAAAAA      | TGAAT |
| #34  | AAAAAAAAAAAAAAAAAAAA      | TGAAT |
| #35A | AAAAAAAAAAAAAAAAAAAA      | TGAAT |
| A5   | AAAAAAAAAAAAAAAAAAAA      | TGAAT |
| A3a  | AAAAAAAAAAAAAAAAAAAA      | TGAAT |
| #N44 | AAAAAAAAAAAAAAAAAAAA      | TGAAT |
| #N39 | AAAAAAAAAAAAAAAAAAAA      | TGAAT |
| #38A | AAAAAAAAAAAAAAAAAAAA      | TGAAT |
| #46  | AAAAAAAAAAAAAAAAAAAA      | TGAAT |
| A14  | AAAAAAAAAAAAAAAAAAAA      | TGAAT |
| A8   | AAAAAAAAAAAAAAAAAAAA      | TGAAT |
| A6b  | AAAAAAAAAAAAAAAAAAAA      | TGAAT |
| A1a  | AAAAAAAAAAAAAAAAAAAA      | TGAAT |
| A6   | AAAAAAAAAAAAAAAAAAAA      | TGAAT |
| #41  | AAAAAAAAAAAAAAAAAAAA      | TGAAT |
| P8   | AAAAAAAAAAAAAAAAAAAA      | TGAAT |
| A2   | AAAAAAAAAAAAAAAAAAAA      | TGAAT |
| A17  | AAAAAAAAAAAAAAAAAAAA      | TGAAT |
| #6   | AAAAAAAAAAAAAAAAAAAA      | TGAAT |
| A2b  | AAAAAAAAAAAAAAAAAAAA      | TGAAT |
| #35  | AAAAAAAAAAAAAAAAAAAA      | TGAAT |
| #36  | AAAAAAAAAAAAAAAAAAAA      | TGAAT |
| #42  | AAAAAAAAAAAAAAAAAAAA      | TGAAT |
| #38  | AAAAAAAAAAAAAAAAAAAA      | TGAAT |
| A1b  | AAAAAAAAAAAAAAAAAAAA      | TGAAT |
| A12  | AAAAAAAAAAAAAAAAAAAA      | TGAAT |
| A11  | <b>G</b> AAAAAAAAAAAAAAAA | TGAAT |
| #4   | <b>G</b> AAAAAAAAAAAAAAAA | TGAAT |
| #44  | <b>G</b> AAAAAAAAAAAAAAAA | TGAAT |



# pGKL1-ORF3

pGKL1 (7922)TAATGTTATTAGATAACAAACACTAAATATATGATATATCTTCATTTTAATTAAAATGTTGT (7983)

|      |                                  |
|------|----------------------------------|
| #17  | AAAAAAAAAAAAAAAAAAAAAAAATGTTGT   |
| A21  | AAAAAAAAAAAAAAAAAAAAAAAATGTTGT   |
| A8p  | AAAAAAAAAAAAAAAAAAAAAAAATGTTGT   |
| #25b | AAAAAAAAAAAAAAAAAAAAAAAATGTTGT   |
| A11  | AAAAAAAAAAAAAAAAAAAAAAAATGTTGT   |
| #32  | AAAAAAAAAAAAAAAAAAAAAAAATGTTGT   |
| #26b | AAAAAAAAAAAAAAAAAAAAAAAATGTTGT   |
| #2   | AAAAAAAAAAAAAAAAAAAAAAAATGTTGT   |
| P18  | AAAAAAAAAAAAAAAAAAAAAAAATGTTGT   |
| #26  | AAAAAAAAAAAAAAAAAAAAAAAATGTTGT   |
| A23  | AAAAAAAAAAAAAAAAAAAAAAAATGTTGT   |
| P26  | AAAAAAAAAAAAAAAAAAAAAAAATGTTGT   |
| A12  | AAAAAAAAAAAAAAAAAAAAAAAATGTTGT   |
| A27  | AAAAAAAAAAAAAAAAAAAAAAAATGTTGT   |
| A34  | AAAAAAAAAAAAAAAAAAAAAAAATGTTGT   |
| A32  | AAAAAAAAAAAAAAAAAAAAAAAATGTTGT   |
| A38  | AAAAAAAAAAAAAAAAAAAAAAAATGTTGT   |
| P15  | AAAAAAAAAAAAAAAAAAAAAAAATGTTGT   |
| #12  | AAAAAAAAAAAAAAAAAAAAAAAATGTTGT   |
| #14  | AAAAAAAAAAAAAAAAAAAAAAAATGTTGT   |
| #16  | AAAAAAAAAAAAAAAAAAAAAAAATGTTGT   |
| #30  | AAAAAAAAAAAAAAAAAAAAAAAATGTTGT   |
| A29  | AAAAAAAAAAAAAAAAAAAAAAAATGTTGT   |
| #18  | AAAAAAAAAAAAAAAAAAAAAAAATGTTGT   |
| A19  | AAAAAAAAAAAAAAAAAAAAAAAATGTTGT   |
| #20  | AAAAAAAAAAAAAAAAAAAAAAAATGTTGT   |
| A15  | AAAAAAAAAAAAAAAAAAAAAAAATGTTGT   |
| A14  | AAAAAAAAAAAAAAAAAAAAAAAATGTTGT   |
| A10  | AAAAAAAAAAAAAAAAAAAAAAAATGTTGT   |
| #25  | AAAAAAAAAAAAAAAAAAAAAAAATGTTGT   |
| A25  | AAAAAAAAAAAAAAAAAAAAAAAATGTTGT   |
| A35  | AAAAAAAAAAAAAAAAAAAAAAAATGTTGT   |
| #21  | AAAAAAAAAAAAAAAAAAAAAAAATGTTGT   |
| #29  | AAAAAAAAAAAAAAAAAAAAAAAATGTTGT   |
| A22  | AAAAAAAAAAAAAAAAAAAAAAAATGTTGT   |
| #22  | <u>G</u> AAAAAAAAAAAAAAAAATGTTGT |
| P25  | <u>G</u> AAAAAAAAAAAAAAAAATGTTGT |
| A13  | AAAAAAAAAAAAAAAAAAAAAAAATGTTGT   |
| #27  | AAAAAAAAAAAAAAAAAAAAAAAATGTTGT   |
| A37  | AAAAAAAAAAAAAAAAAAAAAAAATGTTGT   |
| A24  | AAAAAAAAAAAAAAAAAAAAAAAATGTTGT   |
| A30  | AAAAAAAAAAAAAAAAAAAAAAAATGTTGT   |
| A9   | AAAAAAAAAAAAAAAAAAAAAAAATGTTGT   |
| #33  | AAAAAAAAAAAAAAAAAAAAAAAATGTTGT   |
| P27  | AAAAAAAAAAAAAAAAAAAAAAAATGTTGT   |
| #31  | AAAAAAAAAAAAAAAAAAAAAAAATGTTGT   |
| A31  | AAAAAAAAAAAAAAAAAAAAAAAATGTTGT   |
| P28  | AAAAAATGTTGT                     |
| #6   | AAAAAATGTTGT                     |
| #28  | AAAAAATGTTGT                     |
| P17  | AAAAAATGTTGT                     |
| #15  | AAAAAATGTTGT                     |
| #5   | <u>G</u> AAAAAATGTTGT            |
| #28A | AAAAAATGTTGT                     |
| #35  | AAAAAATGTTGT                     |
| A36  | AAAAAATGTTGT                     |

**pGKL1-ORF4**

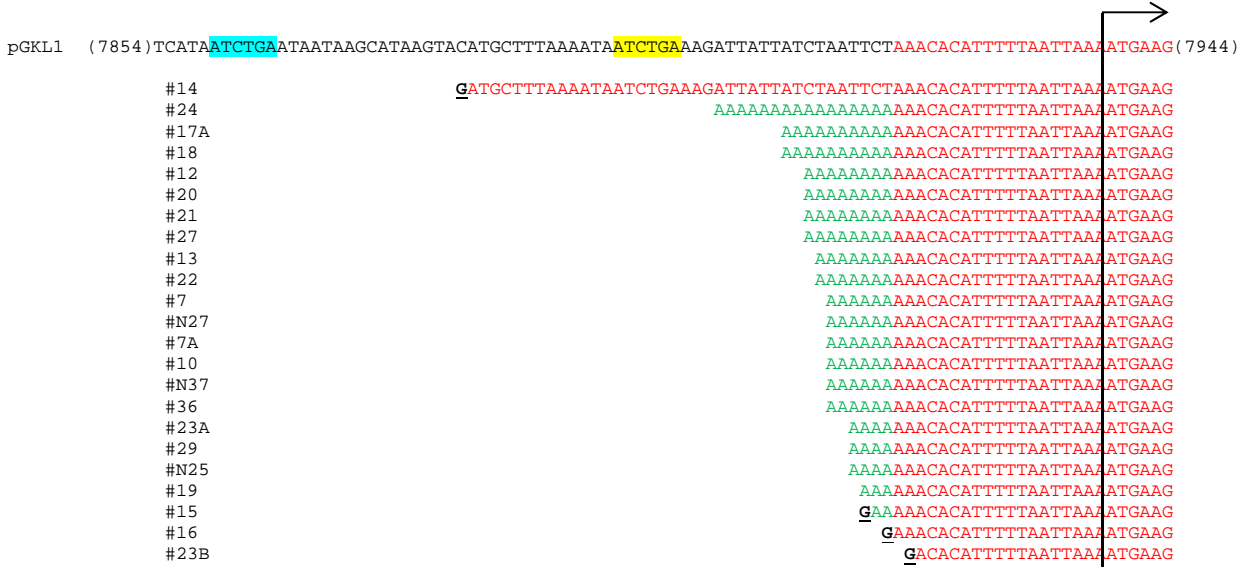

**pGKL2-ORF1**

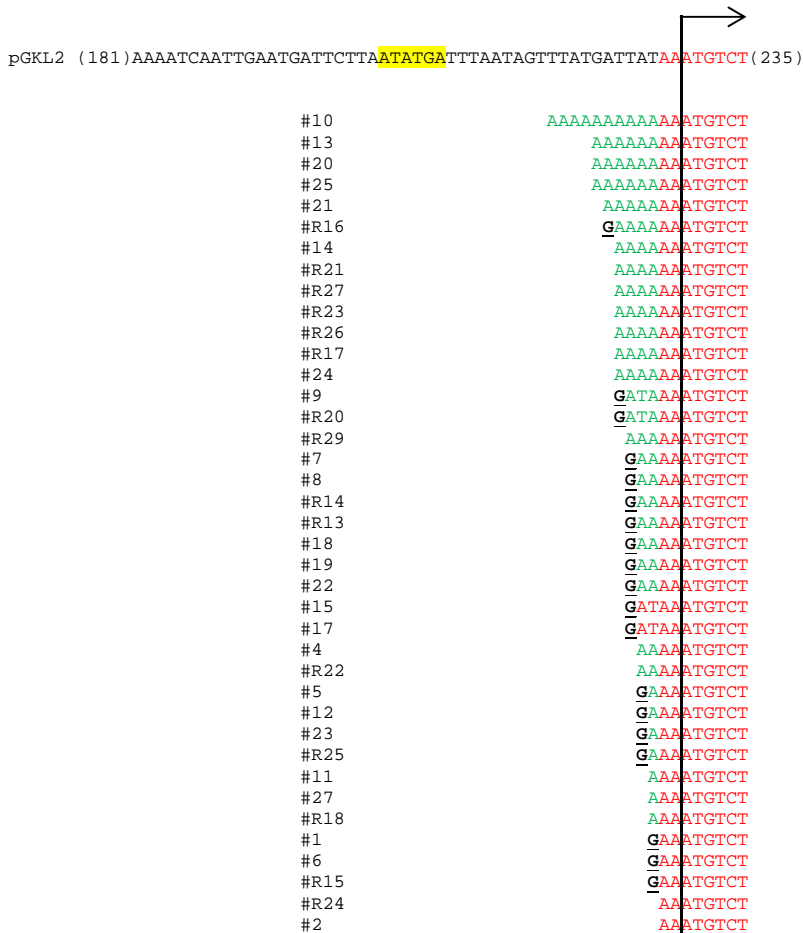

pGKL2-ORF2

pGKL2 (2973) ATATGAAATAAATAGAACCATGAATACCGGAAGTGCACAAGAAATAGAATTATCACGCATGTATTCTTATCATTCTTTCTAAAAAATGAAT (3880)

#30 GATACCGGAAGTGCACAAGAAATAGAATTATCACGCATGTATTCTTATCATTCTTTCTAAAAAATGAAT  
#R19 GATACCGGAAGTGCACAAGAAATAGAATTATCACGCATGTATTCTTATCATTCTTTCTAAAAAATGAAT  
#11 GACCGGAAGTGCACAAGAAATAGAATTATCACGCATGTATTCTTATCATTCTTTCTAAAAAATGAAT  
#14 GACCGGAAGTGCACAAGAAATAGAATTATCACGCATGTATTCTTATCATTCTTTCTAAAAAATGAAT  
#47 GACCGGAAGTGCACAAGAAATAGAATTATCACGCATGTATTCTTATCATTCTTTCTAAAAAATGAAT  
#37 GACCGGAAGTGCACAAGAAATAGAATTATCACGCATGTATTCTTATCATTCTTTCTAAAAAATGAAT  
#36 GACCGGAAGTGCACAAGAAATAGAATTATCACGCATGTATTCTTATCATTCTTTCTAAAAAATGAAT  
#15 GACCGGAAGTGCACAAGAAATAGAATTATCACGCATGTATTCTTATCATTCTTTCTAAAAAATGAAT  
#33 GACCGGAAGTGCACAAGAAATAGAATTATCACGCATGTATTCTTATCATTCTTTCTAAAAAATGAAT  
#17 GACCGGAAGTGCACAAGAAATAGAATTATCACGCATGTATTCTTATCATTCTTTCTAAAAAATGAAT  
#18 GACCGGAAGTGCACAAGAAATAGAATTATCACGCATGTATTCTTATCATTCTTTCTAAAAAATGAAT  
#22 GACCGGAAGTGCACAAGAAATAGAATTATCACGCATGTATTCTTATCATTCTTTCTAAAAAATGAAT  
#24 GACCGGAAGTGCACAAGAAATAGAATTATCACGCATGTATTCTTATCATTCTTTCTAAAAAATGAAT  
#26 GACCGGAAGTGCACAAGAAATAGAATTATCACGCATGTATTCTTATCATTCTTTCTAAAAAATGAAT  
#29 GACCGGAAGTGCACAAGAAATAGAATTATCACGCATGTATTCTTATCATTCTTTCTAAAAAATGAAT  
#48 GACCGGAAGTGCACAAGAAATAGAATTATCACGCATGTATTCTTATCATTCTTTCTAAAAAATGAAT  
#34 GACCGGAAGTGCACAAGAAATAGAATTATCACGCATGTATTCTTATCATTCTTTCTAAAAAATGAAT  
#13 GACCGGAAGTGCACAAGAAATAGAATTATCACGCATGTATTCTTATCATTCTTTCTAAAAAATGAAT  
#6 GGAAGTGCACAAGAAATAGAATTATCACGCATGTATTCTTATCATTCTTTCTAAAAAATGAAT  
#9 GGAAGTGCACAAGAAATAGAATTATCACGCATGTATTCTTATCATTCTTTCTAAAAAATGAAT  
#21 GGAAGTGCACAAGAAATAGAATTATCACGCATGTATTCTTATCATTCTTTCTAAAAAATGAAT  
#32 GGAAGTGCACAAGAAATAGAATTATCACGCATGTATTCTTATCATTCTTTCTAAAAAATGAAT  
#4 AAAAAAATGAAT  
#03 AAAAAAATGAAT

**pGKL2-ORF3**

pGKL2

( 5857 ) ATTATATGGATGTAG **ATATGA** TAAAAATGTAATTCTGATTAGGAAAAGTATTG **-50nts-** **TTTTAATCTGA** TTGTTATAATCAGATAGTAACATCTCACCCCTTTTAAATACCATATTTAGAAAATTATATCTAAGGTAAACCTTTTGCATG ( 5664 )

|      |                        |                |                                                                                              |
|------|------------------------|----------------|----------------------------------------------------------------------------------------------|
| #26  | <u>G</u> AGGAAAAGTATTG | <b>-50nts-</b> | TTTTAATCTGATTGTTATAATCAGATAGTAACATCTCACCCCTTTTAAATACCATATTTAGAAAATTATATCTAAGGTAAACCTTTTGCATG |
| #16  | <u>G</u> AGGAAAAGTATTG | <b>-50nts-</b> | TTTTAATCTGATTGTTATAATCAGATAGTAACATCTCACCCCTTTTAAATACCATATTTAGAAAATTATATCTAAGGTAAACCTTTTGCATG |
| #4   | <u>G</u> AGGAAAAGTATTG | <b>-50nts-</b> | TTTTAATCTGATTGTTATAATCAGATAGTAACATCTCACCCCTTTTAAATACCATATTTAGAAAATTATATCTAAGGTAAACCTTTTGCATG |
| #7   | <u>G</u> AGGAAAAGTATTG | <b>-50nts-</b> | TTTTAATCTGATTGTTATAATCAGATAGTAACATCTCACCCCTTTTAAATACCATATTTAGAAAATTATATCTAAGGTAAACCTTTTGCATG |
| #25A | <u>GG</u> AAAAGTATTG   | <b>-50nts-</b> | TTTTAATCTGATTGTTATAATCAGATAGTAACATCTCACCCCTTTTAAATACCATATTTAGAAAATTATATCTAAGGTAAACCTTTTGCATG |
| #38  | <u>G</u> AGGAAAAGTATTG | <b>-50nts-</b> | TTTTAATCTGATTGTTATAATCAGATAGTAACATCTCACCCCTTTTAAATACCATATTTAGAAAATTATATCTAAGGTAAACCTTTTGCATG |
| #15  | <u>G</u> AGGAAAAGTATTG | <b>-50nts-</b> | TTTTAATCTGATTGTTATAATCAGATAGTAACATCTCACCCCTTTTAAATACCATATTTAGAAAATTATATCTAAGGTAAACCTTTTGCATG |
| #31A | <u>G</u> AGGAAAAGTATTG | <b>-50nts-</b> | TTTTAATCTGATTGTTATAATCAGATAGTAACATCTCACCCCTTTTAAATACCATATTTAGAAAATTATATCTAAGGTAAACCTTTTGCATG |
| #35  | <u>G</u> AGGAAAAGTATTG | <b>-50nts-</b> | TTTTAATCTGATTGTTATAATCAGATAGTAACATCTCACCCCTTTTAAATACCATATTTAGAAAATTATATCTAAGGTAAACCTTTTGCATG |
| #44  | <u>G</u> AGGAAAAGTATTG | <b>-50nts-</b> | TTTTAATCTGATTGTTATAATCAGATAGTAACATCTCACCCCTTTTAAATACCATATTTAGAAAATTATATCTAAGGTAAACCTTTTGCATG |
| #27  | <u>G</u> AGGAAAAGTATTG | <b>-50nts-</b> | TTTTAATCTGATTGTTATAATCAGATAGTAACATCTCACCCCTTTTAAATACCATATTTAGAAAATTATATCTAAGGTAAACCTTTTGCATG |
| #10  | <u>G</u> AAAAAAGTATTG  | <b>-50nts-</b> | TTTTAATCTGATTGTTATAATCAGATAGTAACATCTCACCCCTTTTAAATACCATATTTAGAAAATTATATCTAAGGTAAACCTTTTGCATG |
| #39  | <u>A</u> AAAAAAGTATTG  | <b>-50nts-</b> | TTTTAATCTGATTGTTATAATCAGATAGTAACATCTCACCCCTTTTAAATACCATATTTAGAAAATTATATCTAAGGTAAACCTTTTGCATG |
| #25  | <u>G</u> AAAAGTATTG    | <b>-50nts-</b> | TTTTAATCTGATTGTTATAATCAGATAGTAACATCTCACCCCTTTTAAATACCATATTTAGAAAATTATATCTAAGGTAAACCTTTTGCATG |
| #32  |                        |                | <u>G</u> AAAACATCTCACCCCTTTTAAATACCATATTTAGAAAATTATATCTAAGGTAAACCTTTTGCATG                   |
| #39A |                        |                | <u>A</u> AAAACATCTCACCCCTTTTAAATACCATATTTAGAAAATTATATCTAAGGTAAACCTTTTGCATG                   |
| #31  |                        |                | <u>G</u> AACATCTCACCCCTTTTAAATACCATATTTAGAAAATTATATCTAAGGTAAACCTTTTGCATG                     |
| #37  |                        |                | <u>G</u> AACATCTCACCCCTTTTAAATACCATATTTAGAAAATTATATCTAAGGTAAACCTTTTGCATG                     |
| #18  |                        |                | <u>G</u> AACATCTCACCCCTTTTAAATACCATATTTAGAAAATTATATCTAAGGTAAACCTTTTGCATG                     |
| #8   |                        |                | <u>G</u> AACATCTCACCCCTTTTAAATACCATATTTAGAAAATTATATCTAAGGTAAACCTTTTGCATG                     |
| #29  |                        |                | <u>G</u> AACATCTCACCCCTTTTAAATACCATATTTAGAAAATTATATCTAAGGTAAACCTTTTGCATG                     |
| #4a  |                        |                | <u>G</u> AACATCTCACCCCTTTTAAATACCATATTTAGAAAATTATATCTAAGGTAAACCTTTTGCATG                     |
| #34  |                        |                | <u>G</u> AACATCTCACCCCTTTTAAATACCATATTTAGAAAATTATATCTAAGGTAAACCTTTTGCATG                     |
| #3   |                        |                | <u>G</u> AACATCTCACCCCTTTTAAATACCATATTTAGAAAATTATATCTAAGGTAAACCTTTTGCATG                     |

**-50nts-** = ATAAAACCGTATTGTTCTATACTTAAATTTTATTAGTGAATACTTTCAT

**pGKL2-ORF4**

pGKL2 (5673)GGTTTACCTTAGATATATAATTTCTAAATATGGTATTAAAAAGGGTGAGATGTTACTATCTGATTATAACAATCAGATTAAAAATGAAA (5761)

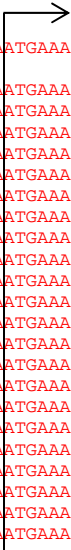

|      |                                                       |
|------|-------------------------------------------------------|
| #7   | <u>G</u> TGAGATGTTACTATCTGATTATAACAATCAGATTAAAAATGAAA |
| #34  | <u>G</u> TGAGATGTTACTATCTGATTATAACAATCAGATTAAAAATGAAA |
| #19  | AAAAAAAAAAAAAAAAAAAAAAAAATGAAA                        |
| #34A | AAAAAAAAATGAAA                                        |
| #2   | AAAAAAAAATGAAA                                        |
| #39  | <u>G</u> AAAAAAAAATGAAA                               |
| #12  | AAAAAAAAATGAAA                                        |
| #44a | AAAAAAAAATGAAA                                        |
| #28  | AAAAAAAAATGAAA                                        |
| #41  | AAAAAAAAATGAAA                                        |
| #35  | AAAAATGAAA                                            |
| #29  | AAAAATGAAA                                            |
| #24  | AAAAATGAAA                                            |
| #19A | <u>G</u> AAAAATGAAA                                   |
| #15  | <u>G</u> AAATGAAA                                     |
| #M51 | <u>G</u> AAATGAAA                                     |
| #25  | <u>G</u> AAATGAAA                                     |
| #31  | <u>G</u> AAATGAAA                                     |
| #13  | <u>G</u> AAATGAAA                                     |
| #22  | <u>G</u> AAATGAAA                                     |
| #21  | <u>G</u> AAATGAAA                                     |
| #44  | <u>G</u> AAATGAAA                                     |



## pGKL2-ORF6

pGKL2 (7932) GAATTTGACAACTATCATTAGCT **ATATGA** TCGTATTAGATATACCT **AAAAATGGAT** (7987)

|      |                             |
|------|-----------------------------|
| #46  | AAAAAAAAAAAAATGGAT          |
| #27  | TGAAAAAAAAAAAAATGGAT        |
| #48  | <u>G</u> AAAAAAAAAAAAATGGAT |
| #34  | AAAAAAAAAAAAATGGAT          |
| #35  | AAAAAAAAAAAAATGGAT          |
| #45  | AAAAAAAAAAAAATGGAT          |
| #44  | AAAAAAAAAAAAATGGAT          |
| #13  | AAAAAAAAAAAAATGGAT          |
| #28a | AAAAAAAAAAAAATGGAT          |
| #33  | AAAAAAAAAAAAATGGAT          |
| #37  | AAAAAAAAAAAAATGGAT          |
| #6   | AAAAAAAAAAAAATGGAT          |
| #36  | AAAAAAAAAAAAATGGAT          |
| #48A | AAAAAAAAAAAAATGGAT          |
| #43  | AAAAAAAAAAAAATGGAT          |
| #8   | AAAAAAAAAAAAATGGAT          |
| #12  | AAAAAAAAAAAAATGGAT          |
| #22  | AAAAAAAAAAAAATGGAT          |
| #2   | AAAAAAAAAAAAATGGAT          |
| #31A | AAAAAAAAAAAAATGGAT          |
| #38A | AAAAAAAAAAAAATGGAT          |
| #39  | AAAAAAAAAAAAATGGAT          |
| #26A | <u>G</u> AAAAAAAAATGGAT     |
| #32A | <u>G</u> AAAAATGGAT         |
| #38  | <u>G</u> AAAAATGGAT         |

## pGKL2-ORF7

pGKL2 (11294) AAAGAATGCTGAATTTACAATTTT **ATGTGA** AGTTGATGATATAAAGT **AAAAATGAAT** (11350)

|      |                     |
|------|---------------------|
| #40  | AAAAAAAAAAAAATGAAT  |
| #41  | AAAAAAAAAAAAATGAAT  |
| #4T7 | AAAAAAAAAAAAATGAAT  |
| #18  | AAAAAAAAAAAAATGAAT  |
| #6   | AAAAAAAAAAAAATGAAT  |
| #7   | AAAAAAAAAAAAATGAAT  |
| #39b | AAAAAAAAAAAAATGAAT  |
| #33b | AAAAAAAAAAAAATGAAT  |
| #32b | AAAAAAAAAAAAATGAAT  |
| #45  | AAAAAAAAAAAAATGAAT  |
| #20  | AAAAAAAAAAAAATGAAT  |
| #35  | AAAAAAAAAAAAATGAAT  |
| #33c | AAAAAAAAAAAAATGAAT  |
| #39  | AAAAAAAAAAAAATGAAT  |
| #23  | AAAAAAAAAAAAATGAAT  |
| #17  | AAAAAAAAAAAAATGAAT  |
| #16  | AAAAAAAAAAAAATGAAT  |
| #32  | AAAAAAAAAAAAATGAAT  |
| #36  | AAAAAATGAAT         |
| #10  | AAAAAATGAAT         |
| #15  | AAAAAATGAAT         |
| #25  | <u>G</u> AAAAATGAAT |
| #47  | AAAAATGAAT          |

pGKL2-ORF8

pGKL2 (11597) ATTCGTCTATGCTTTTATATTGGAATTCTACTTTATGCTCAATAATCTCCATAATGTAT (11539)

|        |                        |
|--------|------------------------|
| #46    | AAAAAAAATCTCCATAATGTAT |
| #9D    | AAAAAAAATCTCCATAATGTAT |
| #9EC   | GAAAAAATCTCCATAATGTAT  |
| #1D    | GAAAAAATCTCCATAATGTAT  |
| #7D    | GAAAAAATCTCCATAATGTAT  |
| #5     | GAAAAAATCTCCATAATGTAT  |
| #28R2  | GAAAAAATCTCCATAATGTAT  |
| #4D    | GAAAAAATCTCCATAATGTAT  |
| #11D   | GAAAAAATCTCCATAATGTAT  |
| #42    | AAATAAATCTCCATAATGTAT  |
| #6     | GAATAAATCTCCATAATGTAT  |
| #6D    | AAAAAATCTCCATAATGTAT   |
| #48    | GAAAAAATCTCCATAATGTAT  |
| #1     | GAAAAAATCTCCATAATGTAT  |
| #20D   | GAAAAAATCTCCATAATGTAT  |
| #3     | GAAAAAATCTCCATAATGTAT  |
| #33BT  | GAAAAAATCTCCATAATGTAT  |
| #38BT  | GAAAAAATCTCCATAATGTAT  |
| #V18AT | GGGAATCTCCATAATGTAT    |
| #3     | AAATCTCCATAATGTAT      |
| #23D   | AAATCTCCATAATGTAT      |
| #39BT  | AAATCTCCATAATGTAT      |
| #7     | GAATCTCCATAATGTAT      |
| #19D   | GAATCTCCATAATGTAT      |
| #14    | GAATCTCCATAATGTAT      |
| #31A   | GAATCTCCATAATGTAT      |
| #47R2  | GAATCTCCATAATGTAT      |
| #8EC   | GAATCTCCATAATGTAT      |
| #28D   | GAATCTCCATAATGTAT      |
| #25D   | GAATCTCCATAATGTAT      |
| #22AT  | GAATCTCCATAATGTAT      |
| #1EC   | AAATCTCCATAATGTAT      |
| #20AT  | AAATCTCCATAATGTAT      |
| #27D   | AAATCTCCATAATGTAT      |
| #3D    | AAATCTCCATAATGTAT      |
| #31    | GATCTCTCCATAATGTAT     |
| #2     | GAATCTCCATAATGTAT      |
| #22D   | GAATCTCCATAATGTAT      |
| #23AT  | GAATCTCCATAATGTAT      |
| #32BT  | GAATCTCCATAATGTAT      |
| #21AT  | GAATCTCCATAATGTAT      |
| #26D   | GAATCTCCATAATGTAT      |
| #7AT   | GAATCTCCATAATGTAT      |
| #18FC  | GAATCTCCATAATGTAT      |
| #45FC  | GAATCTCCATAATGTAT      |
| #44FC  | GAATCTCCATAATGTAT      |
| #43FC  | GAATCTCCATAATGTAT      |
| #29BT  | GAATCTCCATAATGTAT      |
| #12EC  | GAATCTCCATAATGTAT      |
| #10EC  | GAATCTCCATAATGTAT      |
| #43BT  | GAATCTCCATAATGTAT      |
| #2AT   | GAATCTCCATAATGTAT      |
| #7EC   | GAATCTCCATAATGTAT      |
| #6EC   | GAATCTCCATAATGTAT      |
| #4EC   | GAATCTCCATAATGTAT      |
| #3EC   | GAATCTCCATAATGTAT      |
| #2EC   | GAATCTCCATAATGTAT      |
| #2D    | GAATCTCCATAATGTAT      |
| #24D   | GAATCTCCATAATGTAT      |
| #9A    | GAATCTCCATAATGTAT      |
| #13D   | GAATCTCCATAATGTAT      |
| #43    | GAATCTCCATAATGTAT      |
| #37    | GAATCTCCATAATGTAT      |
| #35    | GAATCTCCATAATGTAT      |
| #22    | GAATCTCCATAATGTAT      |
| #19    | GAATCTCCATAATGTAT      |
| #6A    | GAATCTCCATAATGTAT      |
| #10D   | GAATCTCCATAATGTAT      |
| #20    | GAATCTCCATAATGTAT      |
| #8D    | GAATCTCCATAATGTAT      |
| #21D   | GAATCTCCATAATGTAT      |
| #14D   | GAATCTCCATAATGTAT      |
| #17D   | GAATCTCCATAATGTAT      |
| #8     | GAATCTCCATAATGTAT      |
| #13    | GAATCTCCATAATGTAT      |
| #12    | GAATCTCCATAATGTAT      |
| #10    | GAATCTCCATAATGTAT      |
| #9     | GAATCTCCATAATGTAT      |
| #244AT | GAATCTCCATAATGTAT      |



### pGKL2-ORF9

pGKL2 (11490) TGGAAACATT **ATTTGA** ATAGTATTCGACAAATG **AAACATTGGTTATCTTATACATTATGGAG** (11551)

#45 AAAAAAAAAACATTGGTTATCTTATACATTATGGAG  
#10 AAAAAAAAAACATTGGTTATCTTATACATTATGGAG  
#36 AAAAAAAAAACATTGGTTATCTTATACATTATGGAG  
#9 AAAAAAAAAACATTGGTTATCTTATACATTATGGAG  
#32 AAAAAAAAAACATTGGTTATCTTATACATTATGGAG  
#47 AAAAAAAAAACATTGGTTATCTTATACATTATGGAG  
#4 AAAAAAAAAACATTGGTTATCTTATACATTATGGAG  
#22 AAAAAAAAAACATTGGTTATCTTATACATTATGGAG  
#8A AAAAAAAAAACATTGGTTATCTTATACATTATGGAG  
#31A AAAAAAAAAACATTGGTTATCTTATACATTATGGAG  
#19A AAAAAAAAAACATTGGTTATCTTATACATTATGGAG  
#41 AAAAAAAAAACATTGGTTATCTTATACATTATGGAG  
#19 **G**AAAAAAAAACATTGGTTATCTTATACATTATGGAG  
#44 **G**AAAAAAAAACATTGGTTATCTTATACATTATGGAG  
#18 AAAAAACATTGGTTATCTTATACATTATGGAG  
#31 AAAAAACATTGGTTATCTTATACATTATGGAG  
#17 AAAAAACATTGGTTATCTTATACATTATGGAG  
#40 AAAAAACATTGGTTATCTTATACATTATGGAG  
#26 **G**AAAAACATTGGTTATCTTATACATTATGGAG  
#47A **G**AAAAACATTGGTTATCTTATACATTATGGAG  
#16 **G**AAACATTGGTTATCTTATACATTATGGAG  
#29 **G**AAACATTGGTTATCTTATACATTATGGAG  
#30 **G**AAACATTGGTTATCTTATACATTATGGAG  
#43 **G**AAACATTGGTTATCTTATACATTATGGAG

### pGKL2-ORF10

pGKL2 (12861) AATATCAGAAAAATGTAGAAAT **ATATGA** TAAGCTCATAGACATGT **AAAAATGGCT** (12914)

#14 AAAAAAAAAAAAAAAAAAAAAATGGCT  
#5 AAAAAAAAAAAAAAAAAAAAAATGGCT  
#3 AAAAAAAAAAAAAAAAAAAAAATGGCT  
#8 AAAAAAAAAAAAAAAAAAAAAATGGCT  
#12 AAAAAAAAAAAAAAAAAAAAAATGGCT  
#18 AAAAAAAAAAAAAAAAAAAAAATGGCT  
#19 AAAAAAAAAAAAAAAAAAAAAATGGCT  
#16 AAAAAAAAAAAAAAAAAAAAAATGGCT  
#11 AAAAAAAAAAAAAAAAAAAAAATGGCT  
#13 AAAAAAAAAAAAAAAAAAAAAATGGCT  
#7 AAAAAAAAAAAAAAAAAAAAAATGGCT  
#24 AAAAAAAAAAAAAAAAAAAAAATGGCT  
#4 AAAAAATGGCT  
#23 AAAAAATGGCT  
#6 AAAAAATGGCT  
#15 AAAAAATGGCT  
#17 AAAAAATGGCT  
#22 AAAAAATGGCT  
#1 AAAAAATGGCT  
#9 AAAAAATGGCT

### pGKL2-ORF11

pGKL2 (5505) TACATCTACCATAGCAGATCCAG **ATTTGA** TTTATATTTAGCGAATCTTTT **AAACATGCCT** (5565)

#5 AAAAAAAAAAAAAACATGCCT  
#29 AAAAAAAAAAAAAACATGCCT  
#8 AAAAAAAAAAAAAACATGCCT  
#2 AAAAAAAAAAAAAACATGCCT  
#38 AAAAAAAAAAAAAACATGCCT  
#43 AAAAAAAAAAAAAACATGCCT  
#22 AAAAAAAAAAAAAACATGCCT  
#21 AAAAAAAAAAAAAACATGCCT  
#6 AAAAAAAAAAAAAACATGCCT  
#1a AAAAAAAAAAAAAACATGCCT  
#1 AAAAAAAAAAAAAACATGCCT  
#30 AAAAAAAAAAAAAACATGCCT  
#14 AAAAAAAAAAAAAACATGCCT  
#7a AAAAAAAAAAAAAACATGCCT  
#7 AAAAAAAAAAAAAACATGCCT  
#32 AAAAAAAAAAAAAACATGCCT  
#10 AAAAAAAAAAAAAACATGCCT  
#2a AAAAAAAAAAAAAACATGCCT  
#12 **G**AAAAACATGCCT  
#3 AAAAAACATGCCT

## B - The 5' untranslated regions of actin encoded by *K. lactis* IFO1267 strain

### *Kluyveromyces lactis* actin

*Kluyveromyces lactis* strain NRRL Y-1140 chromosome D

(461643)AGAAAGGTTGTTTCAGAAATAACGGTTTTTTTTGTTGATTGCAAAGGAATGTACAACATCTTCACGCGCTATAGTATAACAATATGGAT(461730)

#12s GTACAACATCTTCACGCGCTATAGTATAACAATATGGAT  
#16s GTACAACATCTTCACGCGCTATAGTATAACAATATGGAT  
#28C GTACAACATCTTCACGCGCTATAGTATAACAATATGGAT  
#27C GTACAACATCTTCACGCGCTATAGTATAACAATATGGAT  
#26C GTACAACATCTTCACGCGCTATAGTATAACAATATGGAT  
#29C GTACAACATCTTCACGCGCTATAGTATAACAATATGGAT  
#14G GTACAACATCTTCACGCGCTATAGTATAACAATATGGAT  
#16G GTACAACATCTTCACGCGCTATAGTATAACAATATGGAT  
#30C GTACAACATCTTCACGCGCTATAGTATAACAATATGGAT  
#5A GTACAACATCTTCACGCGCTATAGTATAACAATATGGAT  
#6A GTACAACATCTTCACGCGCTATAGTATAACAATATGGAT  
#7A GTACAACATCTTCACGCGCTATAGTATAACAATATGGAT  
#8A GTACAACATCTTCACGCGCTATAGTATAACAATATGGAT  
#2A GTACAACATCTTCACGCGCTATAGTATAACAATATGGAT  
#20G GTACAACATCTTCACGCGCTATAGTATAACAATATGGAT  
#23G GTACAACATCTTCACGCGCTATAGTATAACAATATGGAT  
#24G GTACAACATCTTCACGCGCTATAGTATAACAATATGGAT  
#25G GTACAACATCTTCACGCGCTATAGTATAACAATATGGAT  
#11A GTACAACATCTTCACGCGCTATAGTATAACAATATGGAT  
#12A GTACAACATCTTCACGCGCTATAGTATAACAATATGGAT  
#4C3 GTACAACATCTTCACGCGCTATAGTATAACAATATGGAT  
#5C3 GTACAACATCTTCACGCGCTATAGTATAACAATATGGAT  
#6C3 GTACAACATCTTCACGCGCTATAGTATAACAATATGGAT  
#7C3 GTACAACATCTTCACGCGCTATAGTATAACAATATGGAT  
#9C3 GTACAACATCTTCACGCGCTATAGTATAACAATATGGAT  
#10C3 GTACAACATCTTCACGCGCTATAGTATAACAATATGGAT  
#32D10 GTACAACATCTTCACGCGCTATAGTATAACAATATGGAT  
#1A GTACAACATCTTCACGCGCTATAGTATAACAATATGGAT  
#39D10 GTACAACATCTTCACGCGCTATAGTATAACAATATGGAT  
#36D10 GTACAACATCTTCACGCGCTATAGTATAACAATATGGAT  
#37D10 GTACAACATCTTCACGCGCTATAGTATAACAATATGGAT  
#2C3 GTACAACATCTTCACGCGCTATAGTATAACAATATGGAT  
#3C3 GTACAACATCTTCACGCGCTATAGTATAACAATATGGAT  
#47s GTACAACATCTTCACGCGCTATAGTATAACAATATGGAT  
#42s GTACAACATCTTCACGCGCTATAGTATAACAATATGGAT  
#18s GTACAACATCTTCACGCGCTATAGTATAACAATATGGAT  
#4C GTACAACATCTTCACGCGCTATAGTATAACAATATGGAT  
#5C GTACAACATCTTCACGCGCTATAGTATAACAATATGGAT  
#7C GTACAACATCTTCACGCGCTATAGTATAACAATATGGAT  
#8C GTACAACATCTTCACGCGCTATAGTATAACAATATGGAT  
#11C GTACAACATCTTCACGCGCTATAGTATAACAATATGGAT  
#17C GTACAACATCTTCACGCGCTATAGTATAACAATATGGAT  
#9A GTACAACATCTTCACGCGCTATAGTATAACAATATGGAT  
#33D10 GTACAACATCTTCACGCGCTATAGTATAACAATATGGAT  
#1C GACGCGCTATAGTATAACAATATGGAT  
#3C GACGCGCTATAGTATAACAATATGGAT  
#2C GACGCGCTATAGTATAACAATATGGAT

## C - The 3' untranslated regions of selected ORFs encoded by pGKL plasmids

### pGKL1-ORF1 (3' RACE)

```
pGKL1      (3198) TAATATATGAAAGTTTTTATAAATAATTATAAAAATGAATATATTTTACATATTTTTGTTTTTGTCTGTCATTTCGTTCAAGGTTTGGAGCATACTCATCGAAGAGGCTCCTTAGTC (3310)
#2          TAATATATGAAAGTTTTTATAAATAATTATAAAAATGAATATATTTTACATATTTTTGTTTTTGTCTGTCATTTCGTTCAAGGTTTGGAGCATACTCATCGAAGAGGCTCCTTAG
#38         TAATATATGAAAGTTTTTATAAATAATTATAAAAATGAATATATTTTACATATTTTTGTTTTTGTCTGTCATTTCGTTCAAGGTTTGGAGCATACTCATCGAAGAGGCTCCTTAG
#4          TAATATATGAAAGTTTTTATAAATAATTATAAAAATGAATATATTTTACATATTTTTGTTTTTGTCTGTCATTTCGTTCAAGGTTTGGAGCATACTCATCGAAGAGGCTCCTTAG
#8          TAATATATGAAAGTTTTTATAAATAATTATAAAAATGAATATATTTTACATATTTTTGTTTTTGTCTGTCATTTCGTTCAAGGTTTGGAGCATACTCATCGAAGAGGCTCCTTAG
#5          TAATATATGAAAGTTTTTATAAATAATTATAAAAATGAATATATTTTACATATTTTTGTTTTTGTCTGTCATTTCGTTCAAGGTTTGGAGCATACTCATCGAAGAGGCTCCTTAG
#6          TAATATATGAAAGTTTTTATAAATAATTATAAAAATGAATATATTTTACATATTTTTGTTTTTGTCTGTCATTTCGTTCAAGGTTTGGAGCATACTCATCGAAGAGGCTCCTTAG
#3A         TAATATATGAAAGTTTTTATAAATAATTATAAAAATGAATATATTTTACATATTTTTGTTTTTGTCTGTCATTTCGTTCAAGGTTTGGAGCATACTCATCGAAGAGGCTCCTTAG
#45         TAATATATGAAAGTTTTTATAAATAATTATAAAAATGAATATATTTTACATATTTTTGTTTTTGTCTGTCATTTCGTTCAAGGTTTGGAGCATACTCATCGAAGAGGCTCCTTAG
#5A         TAATATATGAAAGTTTTTATAAATAATTATAAAAATGAATATATTTTACATATTTTTGTTTTTGTCTGTCATTTCGTTCAAGGTTTGGAGCATACTCATCGAAGAGGCTCCTTAG
#42         TAATATATGAAAGTTTTTATAAATAATTATAAAAATGAATATATTTTACATATTTTTGTTTTTGTCTGTCATTTCGTTCAAGGTTTGGAGCATACTCATCGAAGAGGCTCCTTAG
#43         TAATATATGAAAGTTTTTATAAATAATTATAAAAATGAATATATTTTACATATTTTTGTTTTTGTCTGTCATTTCGTTCAAGGTTTGGAGCATACTCATCGAAGAGGCTCCTTAG
#44         TAATATATGAAAGTTTTTATAAATAATTATAAAAATGAATATATTTTACATATTTTTGTTTTTGTCTGTCATTTCGTTCAAGGTTTGGAGCATACTCATCGAAGAGGCTCCTTAG
#39         TAATATATGAAAGTTTTTATAAATAATTATAAAAATGAATATATTTTACATATTTTTGTTTTTGTCTGTCATTTCGTTCAAGGTTTGGAGCATACTCATCGAAGAGGCTCCTTAG
#7          TAATATATGAAAGTTTTTATAAATAATTATAAAAATGAATATATTTTACATATTTTTGTTTTTGTCTGTCATTTCGTTCAAGGTTTGGAGCATACTCATCGAAGAGGCTCCTTAG
#3          TAATATATGAAAGTTTTTATAAATAATTATAAAAATGAATATATTTTACATATTTTTGTTTTTGTCTGTCATTTCGTTCAAGGTTTGGAGCATACTCATCGAAGAGGCTCCTTAG
#46         TAATATATGAAAGTTTTTATAAATAATTATAAAAATGAATATATTTTACATATTTTTGTTTTTGTCTGTCATTTCGTTCAAGGTTTGGAGCATACTCATCGAAGAGGCTCCTTAG
#31         TAATATATGAAAGTTTTTATAAATAATTATAAAAATGAATATATTTTACATATTTTTGTTTTTGTCTGTCATTTCGTTCAAGGTTTGGAGCATACTCATCGAAGAGGCTCCTTAG
#47         TAATATATGAAAGTTTTTATAAATAATTATAAAAATGAATATATTTTACATATTTTTGTTTTTGTCTGTCATTTCGTTCAAGGTTTGGAGCATACTCATCGAAGAGGCTCCTTAG
#4A         TAATATATGAAAGTTTTTATAAATAATTATAAAAATGAATATATTTTACATATTTTTGTTTTTGTCTGTCATTTCGTTCAAGGTTTGGAGCATACTCATCGAAGAGGCTCCTTAG
#37         TAATATATGAAAGTTTTTATAAATAATTATAAAAATGAATATATTTTACATATTTTTGTTTTTGTCTGTCATTTCGTTCAAGGTTTGGAGCATACTCATCGAAGAGGCTCCTTAG
#2A        TAATATATGAAAGTTTTT
```

**pGKL2-ORF5 (3' RACE)**

pGKL2 (7959) TGA-114nts-AACTAAGTTACTGTGCTATATACAATGACAGAGAAGCTTCCTATAATGATTGGTAGTTCCTGGATATTAGCAAAGAAAAT (8155)

```

#9      TGA-114nts-AACTAAGTTACTGTGCTATATACAATGACAGAGAAGCTTCCTATAATGATTGGTAGTTCCTGGATATTAGCAA
#14     TGA-114nts-AACTAAGTTACTGTGCTATATACAATGACAGAGAAGCTTCCTATAATGATTGGTAGTTCCTGGATATTAGCAA
#18     TGA-114nts-AACTAAGTTACTGTGCTATATACAATGACAGAGAAGCTTCCTATAATGATTGGTAGTTCCTGGATATTAGCAA
#N15    TGA-114nts-AACTAAGTTACTGTGCTATATACAATGACAGAGAAGCTTCCTATAATGATTGGTAGTTCCTGGATATTAGCAA
#4b     TGA-114nts-AACTAAGTTACTGTGCTATATACAATGACAGAGAAGCTTCCTATAATGATTGGTAGTTCCTGGATATTAGCAA
#13     TGA-114nts-AACTAAGTTACTGTGCTATATACAATGACAGAGAAGCTTCCTATAATGATTGGTAGTTCCTGGATATTAGCAA
#24     TGA-114nts-AACTAAGTTACTGTGCTATATACAATGACAGAGAAGCTTCCTATAATGATTGGTAGTTCCTGGATATTAGCAA
#23     TGA-114nts-AACTAAGTTACTGTGCTATATACAATGACAGAGAAGCTTCCTATAATGATTGGTAGTTCCTGGATATTAGCAA
#8      TGA-114nts-AACTAAGTTACTGTGCTATATACAATGACAGAGAAGCTTCCTATAATGATTGGTAGTTCCTGGATATTAGCAA
#11     TGA-114nts-AACTAAGTTACTGTGCTATATACAATGACAGAGAAGCTTCCTATAATGATTGGTAGTTCCTGGATATTAGCAA
#20     TGA-114nts-AACTAAGTTACTGTGCTATATACAATGACAGAGAAGCTTCCTATAATGATTGGTAGTTCCTGGATATTAGCAA
#19     TGA-114nts-AACTAAGTTACTGTGCTATATACAATGACAGAGAAGCTTCCTATAATGATTGGTAGTTCCTGGATATTAGCAA
#15     TGA-114nts-AACTAAGTTACTGTGCTATATACAATGACAGAGAAGCTTCCTATAATGATTGGTAGTTCCTGGATATTAGCAA
#21     TGA-114nts-AACTAAGTTACTGTGCTATATACAATGACAGAGAAGCTTCCTATAATGATTGGTAGTTCCTGGATATTAGCAA
#12     TGA-114nts-AACTAAGTTACTGTGCTATATACAATGACAGAGAAGCTTCCTATAATGATTGGTAGTTCCTGGATATTAG
#17     TGA-114nts-AACTAAGTTACTGTGCTATATACAATGACAGAGAAGCTTCCTATAATGATTGGTAGTTCCTGGATATTAG
#6      TGA-114nts-AACTAAGTTACTGTGCTATATACAATGACAGAGAAGCTTCCTATAATGATTGGTA
#5b     TGA-114nts-AACTAAGTTACTGTGCTATATACAATGACAGAGAAGCTTCCTATAATGA
#21     TGA-114nts-AACTAAGTTACTGTGCTATATACAATGACAGAGAAGCTTCCTATAATG
#4a     TGA-114nts-AACTAAGTTACTGTGCTATATACAATGACAGAGAAGCTTCCTATAAT
#16     TGA-114nts-AACTAAGTTACTGTGCTATATACAATGACAGAGAAGCTTCCTATAAT
#5a     TGA-114nts-AACTAAGTTACTGTGCTATATACAATGACAGAGAAGCTTCCTATAAT
#13     TGA-114nts-AACTAAGTTACTGTGCTATATACAATGACAGAGAAGCTTCCTATAAT
#3      TGA-114nts-AACTAAGTTACTGTGCTATATACAATGACAGAGAAGCTTCCTATAAT
#22     TGA-114nts-AACTAAGTTACTGTGCTATATACAATGACAGAGAAGCTTCCTATAAT
#N14    TGA-114nts-AACTAAGTTACTGTGCTATATACAATGACAGAGAAGCTTCCTATAA
#17     TGA-114nts-AACTAAGTTACTGTGCTATATACA

```

-114nts-

=

TCGTATTAGATATACCTAAAATGGATTATGGACAAATAGAAATTTATAACGATTATTTTAGAATGTTGATAAGAAAACATAAAAATACACTCCCATTGGAGTGCATAGAATATA

**pGKL2-ORF10 (3' RACE)**

pGKL2 (13218) TAAATTATTATGTAACATTAATATACATTTAACACTGTATGCTACTATAACTGATTTTT (13277)

```

#3      TAAATTATTATGTAACATTAATATACATTTAACACTGTATGCTACTATAACTGAT
#27     TAAATTATTATGTAACATTAATATACATTTAACACTGTATGCTACTATAACTGAT
#5      TAAATTATTATGTAACATTAATATACATTTAACACTGTATGCTACTATAACTGAT
#25     TAAATTATTATGTAACATTAATATACATTTAACACTGTATGCTACTATAACTGAT
#23     TAAATTATTATGTAACATTAATATACATTTAACACTGTATGCTACTATAACTGAT
#22     TAAATTATTATGTAACATTAATATACATTTAACACTGTATGCTACTATAACTGAT
#21     TAAATTATTATGTAACATTAATATACATTTAACACTGTATGCTACTATAACTGAT
#20     TAAATTATTATGTAACATTAATATACATTTAACACTGTATGCTACTATAACTGAT
#19     TAAATTATTATGTAACATTAATATACATTTAACACTGTATGCTACTATAACTGAT
#6      TAAATTATTATGTAACATTAATATACATTTAACACTGTATGCTACTATAACTGAT
#16     TAAATTATTATGTAACATTAATATACATTTAACACTGTATGCTACTATAACTGAT
#8      TAAATTATTATGTAACATTAATATACATTTAACACTGTATGCTACTATAACTGAT
#10     TAAATTATTATGTAACATTAATATACATTTAACACTGTATGCTACTATAACTGAT
#13     TAAATTATTATGTAACATTAATATACATTTAACACTGTATGCTACTATAACTGAT
#1      TAAATTATTATGTAACATTAATATACATTTAACACTGTATGCTACTATAACTGA
#9      TAAATTATTATGTAACATTAATATACATTTAACACTGTATGCTACTATAACTGA
#14     TAAATTATTATGTAACATTAATATACATTTAACACTGTATGCTACTATAACTGA
#15     TAAATTATTATGTAACATTAATATACATTTAACACTGTATGCTACTATAACTGA
#2      TAAATTATTATGTAACATTAATATACATTTAACACTGTATGCTACTATAACTGA
#4      TAAATTATTATGTAACATTAATATACATTTAACACTGTATGCTACTATAACTGA
#17     TAAATTATTATGTAACATTAATATACATTTAACACTGTATGCTACTATAACTG
#26     TAAATTATTATGTAACATTAATATACATTTAACACTGTATGCTACTATAACTG

```

(A) The 5' untranslated regions of ORFs encoded by pGKL plasmids. Plasmid DNA (pGKL1 or pGKL2 respectively) is shown for each ORF with the AUG initiation site (marked by vertical line and arrow which points in the direction of transcription) and part of DNA upstream of the start codon including Upstream Conserved Sequence (UCS, in yellow box). In the case of *K1ORF4*, *K2ORF3* and *K2ORF4*, new putative UCS sequences were found (shown in blue box), based on the detected transcripts. Numbers on both sides of the plasmid sequence indicate the position of the DNA sequence relative to the GI: 163932456 (for pGKL1) or GI: 2868 (for pGKL2), respectively. Individual obtained cDNA sequences corresponding to transcripts of a given ORF are aligned below the template DNA. After isolation of mRNA from *K. lactis* IFO1267 strain, cDNA was prepared by SuperScript III Reverse Transcriptase (M-MuLV mutant; clone names beginning with the number sign #), or by AMV Reverse Transcriptase (Finnzymes; clone names beginning with the letter A; this was performed only for *K1ORF2*, *K1ORF3* and *K2ORF5*). In this comparison, we have also included clones obtained from a double-mutant strain *K. lactis*  $\Delta$ *pbp1*  $\Delta$ *pab1* (see text; clone names beginning with the letter P; this was performed only for *K1ORF2* and *K1ORF3*). From the uniform distribution of the clones is evident that neither used reverse transcriptase nor strain used for mRNA isolation / cDNA synthesis / clone preparation affects the results. At least 20 independent clones were sequenced and aligned with plasmid (template) DNA sequence of each ORF. Sequence parts that show sequence identity to the template plasmid DNA are labelled in red. Sequence parts that do not show sequence identity to the template plasmid DNA, thus contain non-templated nucleotides of mRNA transcripts are labelled in green. Guanosine residues which correspond to the original caps at the 5' ends of the mRNAs are depicted as underlined black G. All sequences are shown in 5' to 3' transcription orientation, regardless of ORF natural orientation in pGKL plasmids.

(B) The 5' untranslated regions of actin gene (KLLA0\_D05357g) encoded by *K. lactis* IFO1267 strain. Chromosomal DNA is shown for *ACT* gene AUG initiation site including (marked by vertical line and arrow which points in the direction of transcription) and part of DNA upstream of the start codon. Numbers on both sides of the chromosomal sequence indicate the position of the DNA sequence relative to the EnsemblFungi Id: KLLA0\_D05357g. Individual obtained cDNA sequences corresponding to transcripts of a given ORF are aligned below the template DNA.

(C) The 3' untranslated regions of *K1ORF1*, *K2ORF5* and *K2ORF10* encoded by pGKL plasmids. Template DNA with indicated stop codon (in the gray box) is shown for each ORF. Numbers on both sides of the plasmid sequence indicate the position of the DNA sequence relative to the GenBank records indicated above. Unique obtained sequences (prepared using SuperScript III Reverse Transcriptase) corresponding to transcripts of a given ORF are aligned under the template DNA. At least 20 independent clones were sequenced and aligned with plasmid (template) DNA of each ORF.

**Table S6.** 5' mRNA cap occurrence frequency in pGKL transcripts with different number of non-templated adenosines in 5' poly(A) leader.

| <b>No. of non-templated adenosines</b> | <b>No. of sequences</b> | <b>No. of sequences with 5' mRNA cap</b> | <b>5' mRNA cap occurrence frequency</b> |
|----------------------------------------|-------------------------|------------------------------------------|-----------------------------------------|
| 0                                      | 88                      | 72                                       | 82%                                     |
| 1                                      | 25                      | 19                                       | 76%                                     |
| 2                                      | 37                      | 20                                       | 54%                                     |
| 3                                      | 23                      | 6                                        | 26%                                     |
| 4                                      | 30                      | 2                                        | 7%                                      |
| 5                                      | 33                      | 1                                        | 3%                                      |
| 6+                                     | 114                     | 3                                        | 2.6%                                    |

**Table S7.** The degree of 5' capping and 5' polyadenylation of pGKL mRNAs is determined by the respective UCR promoter region.

|                                                              | <b>% of 5' non-templately polyadenylated RNAs</b> | <b>% of 5' capped RNAs</b> | <b>Median / mean of adenosines added per mRNA</b> | <b>No. of 5' non-templated adenosines</b> |
|--------------------------------------------------------------|---------------------------------------------------|----------------------------|---------------------------------------------------|-------------------------------------------|
| <b><i>K2ORF2</i> under control of native promoter *</b>      | 8.2                                               | 91.7                       | 0.0 / 0.8                                         | 1                                         |
| <b><i>K2ORF2</i> under control of <i>K1UCR1</i> promoter</b> | 92.3                                              | 7.7                        | 5.0 / 4.9                                         | 2-11                                      |
| <b><i>K1ORF1</i> under control of native promoter *</b>      | 85.1                                              | 22.2                       | 5.0 / 5.3                                         | 1-10                                      |
|                                                              |                                                   |                            |                                                   |                                           |
| <b><i>G418</i> under control of <i>K1UCR2</i> promoter</b>   | 96.4                                              | 3.6                        | 5.5 / 5.3                                         | 0-10                                      |
| <b><i>K1ORF2</i> under control of native promoter *</b>      | 96.2                                              | 7.5                        | 6.0 / 6.0                                         | 2-14                                      |

Data represents 5' RACE analysis of the *K1ORF1*, *K1ORF2*, *K2ORF2* and *G418<sup>R</sup>* mRNAs in the *K. lactis* IFO1267\_pRKL2-1 strain and/or its parental strain *K. lactis* IFO1267 (marked with asterisk).

**Table S8.** Number of non-templated adenosine nucleotides in pGKL transcripts increases with the number of 5' poly(A) leader adenosines encoded by the template.

| <b>Templated adenosines</b> | <b>No. of sequences</b> | <b>Non-templated adenosines (median / mean)</b> |
|-----------------------------|-------------------------|-------------------------------------------------|
| 2                           | 36                      | 2.0 / 2.5                                       |
| 3                           | 139                     | 4.0 / 4.1                                       |
| 4                           | 94                      | 6.0 / 5.8                                       |
| 5                           | 104                     | 6.0 / 6.8                                       |



**Table S9.** 5' RACE analysis revealed that deletion of the *PAB1* gene does not remarkably affect the structure of the 5' ends of the pGKL mRNAs in *K. lactis* cells.

|                                                     | <b>% of 5' non-templately polyadenylated mRNAs</b> | <b>% of 5' capped mRNAs</b> | <b>Median / mean of adenosines added per mRNA</b> | <b>No. of 5' non-templated adenosines</b> |
|-----------------------------------------------------|----------------------------------------------------|-----------------------------|---------------------------------------------------|-------------------------------------------|
| <b><i>K1ORF2</i> (IFO1267) *</b>                    | 96.2                                               | 7.5                         | 6.0 / 6.0                                         | 2-14                                      |
| <b><i>K1ORF2</i><br/>IFO1267 <i>pbp1Δ pab1Δ</i></b> | 100.0                                              | 0.0                         | 7.0 / 7.2                                         | 5-10                                      |
|                                                     |                                                    |                             |                                                   |                                           |
| <b><i>K1ORF3</i> (IFO1267) *</b>                    | 98.2                                               | 5.3                         | 7.0 / 6.7                                         | 0-20                                      |
| <b><i>K1ORF3</i><br/>IFO1267 <i>pbp1Δ pab1Δ</i></b> | 100.0                                              | 14.2                        | 4.0 / 5.5                                         | 1-11                                      |

Data represents 5' RACE analysis of the *K1ORF2* and *K1ORF3* mRNAs in the *K. lactis* IFO1267 *pbp1Δ pab1Δ* strain and its parental strain *K. lactis* IFO1267 (marked with asterisk).

**Table S10.** Detailed statistical results of the length of 5' poly(A) leaders as depicted in Figure 4. Adjusted p-values corresponding to all possible ORF pairs are depicted in the triangle below.

|                | <i>K1ORF1</i> | <i>K1ORF2</i> | <i>K1ORF3</i> | <i>K1ORF4</i> | <i>K2ORF1</i> | <i>K2ORF10</i> | <i>K2ORF11</i> | <i>K2ORF4</i> | <i>K2ORF5</i> | <i>K2ORF6</i> | <i>K2ORF7</i> | <i>K2ORF8</i> |
|----------------|---------------|---------------|---------------|---------------|---------------|----------------|----------------|---------------|---------------|---------------|---------------|---------------|
| <i>K1ORF2</i>  | 7.7550E-02    |               |               |               |               |                |                |               |               |               |               |               |
| <i>K1ORF3</i>  | 2.3586E-03    | 1.5796E-01    |               |               |               |                |                |               |               |               |               |               |
| <i>K1ORF4</i>  | 9.4012E-01    | 1.3077E-01    | 6.8512E-03    |               |               |                |                |               |               |               |               |               |
| <i>K2ORF1</i>  | 7.1584E-07    | 4.7946E-15    | 5.1673E-20    | 1.8159E-06    |               |                |                |               |               |               |               |               |
| <i>K2ORF10</i> | 7.9875E-01    | 5.3549E-02    | 2.0836E-03    | 7.5276E-01    | 2.5665E-05    |                |                |               |               |               |               |               |
| <i>K2ORF11</i> | 6.3346E-01    | 3.9942E-01    | 4.4490E-02    | 7.1093E-01    | 2.6219E-07    | 4.6810E-01     |                |               |               |               |               |               |
| <i>K2ORF4</i>  | 1.8324E-05    | 1.5043E-10    | 6.2869E-14    | 2.7037E-05    | 9.5564E-01    | 1.9880E-04     | 5.2996E-06     |               |               |               |               |               |
| <i>K2ORF5</i>  | 3.7964E-07    | 2.1512E-16    | 7.3018E-22    | 1.1537E-06    | 9.2680E-01    | 1.9815E-05     | 1.6321E-07     | 9.0119E-01    |               |               |               |               |
| <i>K2ORF6</i>  | 6.3971E-01    | 3.1921E-01    | 2.3704E-02    | 7.1093E-01    | 4.8730E-08    | 4.6810E-01     | 9.5564E-01     | 2.0464E-06    | 2.2551E-08    |               |               |               |
| <i>K2ORF7</i>  | 1.4373E-03    | 6.2947E-02    | 5.0437E-01    | 3.3298E-03    | 7.6681E-16    | 1.1487E-03     | 1.8723E-02     | 2.0175E-12    | 1.2879E-16    | 1.0618E-02    |               |               |
| <i>K2ORF8</i>  | 9.9868E-23    | 3.8536E-44    | 1.0758E-52    | 1.9026E-20    | 2.1119E-07    | 1.6511E-17     | 2.6452E-21     | 5.7407E-05    | 8.2255E-09    | 2.8832E-24    | 4.0538E-36    |               |
| <i>K2ORF9</i>  | 5.5264E-05    | 3.1585E-10    | 8.0237E-14    | 8.2700E-05    | 7.1093E-01    | 6.1356E-04     | 1.6495E-05     | 7.1093E-01    | 7.6347E-01    | 6.4047E-06    | 4.6069E-12    | 1.0000E-06    |

**Table S11.** Detailed statistical analysis of the results depicted in Figure 6. Adjusted p-values corresponding to all possible pairs are shown below.

| No. of 5' adenosines encoded by the template |            |            |            |
|----------------------------------------------|------------|------------|------------|
|                                              | 2A         | 3A         | 4A         |
| 3A                                           | 1.9208E-03 |            |            |
| 4A                                           | 1.8633E-09 | 4.7759E-06 |            |
| 5A                                           | 3.4732E-11 | 2.1735E-08 | 4.0279E-01 |

**Table S12.** Guanosine caps at the 5' ends of the pGKL mRNAs are N7-methylated. Tabular representation of the 5' RACE experiments using total RNA prepared from *K. lactis* IFO1267. RNA preparations were analyzed untreated or treated with Rai1 or hDcp2. Results clearly show that pGKL and actin mRNAs were significantly decapped by hDcp2 but were resistant to decapping by Rai1. Numbers represent fractions of capped RNAs from all the independent cDNA clones analyzed. The latter are depicted as numbers in brackets labelled with <sup>NAC</sup> (NAC – number of analyzed clones). Numbers labelled with an asterisk are replicated from Table S4.

| Analyzed ORF / gene | % of 5' capped RNAs          | % of 5' capped RNAs after incubation with Rai1 | % of 5' capped RNAs after incubation with hDcp2 |
|---------------------|------------------------------|------------------------------------------------|-------------------------------------------------|
| <i>K2ORF1</i>       | 48.7* / (39 <sup>NAC</sup> ) | 40.0 / (15 <sup>NAC</sup> )                    | 2.7 / (36 <sup>NAC</sup> )                      |
| <i>K2ORF2</i>       | 91.7* / (24 <sup>NAC</sup> ) | 92.3 / (13 <sup>NAC</sup> )                    | 0 / (13 <sup>NAC</sup> )                        |
| actin               | 100* / (49 <sup>NAC</sup> )  | 100 / (28 <sup>NAC</sup> )                     | 0 / (15 <sup>NAC</sup> )                        |

**Table S13.** Summary of 5' RACE experiments of polysomal analyses. Messenger RNAs of each ORF subjected to 5' RACE analysis are characterized by the following data: 1/ ORF name; 2/ yeast strain used for mRNA isolation and cultivation temperature; 3/ source of isolated mRNA; 4/ total number of analyzed clones; 5/ median and mean of added adenosines per mRNA molecule; 6/ median of all 5' adenosines (templated and non-templated) per mRNA molecule; 7/ number of 5' capped mRNAs; 8/ number of 5' polyadenylated mRNAs; 9/ number of 5' polyadenylated and uncapped mRNAs; 10/ number of 5' capped mRNAs and non-polyadenylated mRNAs. In blue are depicted mRNAs purified from yeast strains cultivated at permissive (24°C) temperatures, in red are depicted mRNAs purified from yeast strains cultivated at non-permissive (37°C) temperatures. Total - these numbers are replicated from Table S4; polysomal - high polysome fraction (see Figure 11); unbound - mRNAs not found in polysomes (see Figure 11). Figures 12 and 13 are based on the data shown in this table.

| ORF       | Yeast strain                                                                  | RNA                | No. of analysed clones | Median / Mean of added adenosines per mRNA |     | Median of all 5' adenosines (templated and non-templated) per mRNA | No. of 5' capped mRNAs | No. of 5' polyadenylated mRNAs | No. of 5' polyadenylated and uncapped mRNAs | No. of 5' capped mRNAs and non-polyadenylated mRNAs |
|-----------|-------------------------------------------------------------------------------|--------------------|------------------------|--------------------------------------------|-----|--------------------------------------------------------------------|------------------------|--------------------------------|---------------------------------------------|-----------------------------------------------------|
|           |                                                                               |                    |                        |                                            |     |                                                                    |                        |                                |                                             |                                                     |
| K1ORF2    | <i>K. lactis</i> IFO1267<br>28 °C                                             | total <sup>1</sup> | 53                     | 6.0                                        | 6.0 | 10                                                                 | 4                      | 51                             | 48                                          | 2                                                   |
|           |                                                                               | polysomal          | 13                     | 8.0                                        | 8.0 | 12                                                                 | 1                      | 13                             | 12                                          | 0                                                   |
|           | <i>S. cerevisiae</i><br>CWO4p <sup>0</sup> <i>cdc33-42</i><br>[pGKL1/2] 24 °C | unbound            | 20                     | 6.0                                        | 5.4 | 10                                                                 | 2                      | 19                             | 18                                          | 0                                                   |
|           |                                                                               | polysomal          | 16                     | 6.0                                        | 6.7 | 10                                                                 | 0                      | 16                             | 16                                          | 0                                                   |
|           | <i>S. cerevisiae</i><br>CWO4p <sup>0</sup> <i>cdc33-42</i><br>[pGKL1/2] 37 °C | unbound            | 9                      | 9.0                                        | 9.4 | 13                                                                 | 0                      | 9                              | 9                                           | 0                                                   |
|           |                                                                               | polysomal          | 15                     | 9.0                                        | 9.3 | 13                                                                 | 1                      | 14                             | 14                                          | 1                                                   |
| K2ORF5    | <i>K. lactis</i> IFO1267<br>28 °C                                             | total <sup>1</sup> | 50                     | 2.0                                        | 2.7 | 5                                                                  | 17                     | 45                             | 30                                          | 2                                                   |
|           |                                                                               | unbound            | 10                     | 2.0                                        | 2.7 | 5                                                                  | 4                      | 7                              | 6                                           | 3                                                   |
|           |                                                                               | polysomal          | 14                     | 2.0                                        | 2.5 | 5                                                                  | 8                      | 11                             | 6                                           | 3                                                   |
|           | <i>S. cerevisiae</i><br>CWO4p <sup>0</sup> <i>cdc33-42</i><br>[pGKL1/2] 24 °C | unbound            | 16                     | 2.0                                        | 2.3 | 5                                                                  | 1                      | 12                             | 12                                          | 1                                                   |
|           |                                                                               | polysomal          | 26                     | 1.0                                        | 1.8 | 4                                                                  | 15                     | 16                             | 8                                           | 8                                                   |
|           | <i>S. cerevisiae</i><br>CWO4p <sup>0</sup> <i>cdc33-42</i><br>[pGKL1/2] 37 °C | unbound            | 10                     | 1.0                                        | 1.6 | 4                                                                  | 1                      | 5                              | 5                                           | 1                                                   |
| polysomal |                                                                               | 20                 | 1.0                    | 1.4                                        | 4   | 11                                                                 | 10                     | 7                              | 8                                           |                                                     |
| K2ORF8    | <i>K. lactis</i> IFO1267<br>28 °C                                             | total <sup>1</sup> | 79                     | 0                                          | 1.0 | 2                                                                  | 68                     | 36                             | 11                                          | 43                                                  |
|           |                                                                               | unbound            | 9                      | 0                                          | 0.6 | 2                                                                  | 7                      | 3                              | 2                                           | 6                                                   |
|           | <i>S. cerevisiae</i><br>CWO4p <sup>0</sup> <i>cdc33-42</i><br>[pGKL1/2] 24 °C | polysomal          | 10                     | 0                                          | 0.3 | 2                                                                  | 8                      | 2                              | 2                                           | 8                                                   |
|           |                                                                               | unbound            | 8                      | 0                                          | 0.5 | 2                                                                  | 7                      | 3                              | 1                                           | 5                                                   |
|           | <i>S. cerevisiae</i><br>CWO4p <sup>0</sup> <i>cdc33-42</i><br>[pGKL1/2] 37 °C | polysomal          | ND                     | N/A                                        | N/A | N/A                                                                | N/A                    | N/A                            | N/A                                         | N/A                                                 |
| K2ORF10   | <i>K. lactis</i> IFO1267<br>28 °C                                             | total <sup>1</sup> | 20                     | 4.5                                        | 4.8 | 8                                                                  | 0                      | 18                             | 18                                          | 0                                                   |
|           |                                                                               | unbound            | 21                     | 1.0                                        | 2.6 | 5                                                                  | 3                      | 17                             | 15                                          | 1                                                   |
|           | <i>S. cerevisiae</i><br>CWO4p <sup>0</sup> <i>cdc33-42</i><br>[pGKL1/2] 24 °C | polysomal          | 21                     | 1.0                                        | 2.2 | 5                                                                  | 8                      | 15                             | 10                                          | 3                                                   |
|           |                                                                               | unbound            | 16                     | 1.0                                        | 1.8 | 5                                                                  | 0                      | 12                             | 12                                          | 0                                                   |
|           | <i>S. cerevisiae</i><br>CWO4p <sup>0</sup> <i>cdc33-42</i><br>[pGKL1/2] 37 °C | polysomal          | 23                     | 0                                          | 1.8 | 4                                                                  | 4                      | 12                             | 10                                          | 4                                                   |

<sup>1</sup> from Table S4

## SUPPLEMENTARY REFERENCES

- Altmann, M., Sonenberg, N., and Trachsel, H. (1989). Translation in *Saccharomyces cerevisiae*: Initiation Factor 4E-Dependent Cell-Free System. *Molecular and Cellular Biology* 9(10), 4467-4472.
- Faul, F., Erdfelder, E., Lang, A.G., and Buchner, A. (2007). G\*Power 3: a flexible statistical power analysis program for the social, behavioral, and biomedical sciences. *Behav Res Methods* 39(2), 175-191.
- Gueldener, U., Heinisch, J., Koehler, G.J., Voss, D., and Hegemann, J.H. (2002). A second set of loxP marker cassettes for Cre-mediated multiple gene knockouts in budding yeast. *Nucleic Acids Res* 30(6), e23.
- Guldener, U., Heck, S., Fielder, T., Beinhauer, J., and Hegemann, J.H. (1996). A new efficient gene disruption cassette for repeated use in budding yeast. *Nucleic Acids Res* 24(13), 2519-2524.
- Gunge, N., Tamaru, A., Ozawa, F., and Sakaguchi, K. (1981). Isolation and Characterization of Linear Deoxyribonucleic Acid Plasmids from *Kluyveromyces lactis* and the Plasmid-Associated Killer Character. *Journal of Bacteriology* 145(1), 382-390.
- Gunge, N., and Yamane, C. (1984). Incompatibility of linear DNA killer plasmids pGKL1 and pGKL2 from *Kluyveromyces lactis* with mitochondrial DNA from *Saccharomyces cerevisiae*. *J Bacteriol* 159(2), 533-539.
- Lin, R.J., Kim, D.H., Castanotto, D., Westaway, S., and Rossi, J.J. (1996). "RNA preparation from yeast cells " in *A Laboratory Guide to RNA: Isolation, Analysis, and Synthesis*, ed. P.A. Krieg. Wiley-Liss, New York), 43-50.
- Masek, T., Vopalensky, V., Suchomelova, P., and Pospisek, M. (2005). Denaturing RNA electrophoresis in TAE agarose gels. *Anal Biochem* 336(1), 46-50.
- Sýkora, M., Pospíšek, M., Novák, J., Mrvová, S., Krásný, L., and Vopálenký, V. (2018). Transcription apparatus of the yeast virus-like elements: Architecture, function, and evolutionary origin. *PLoS Pathog* 14(10), e1007377. doi: 10.1371/journal.ppat.1007377.
- Valis, K., Masek, T., Novotna, D., Pospisek, M., and Janderova, B. (2006). Immunity to killer toxin K1 is connected with the Golgi-to-vacuole protein degradation pathway. *Folia Microbiol (Praha)* 51(3), 196-202.
- Woods, D.R., and Bevan, E.A. (1968). Studies on Nature of Killer Factor Produced by *Saccharomyces Cerevisiae*. *Journal of General Microbiology* 51, 115-126. doi: 10.1099/00221287-51-1-115.
